## Deciphering the potential niche of novel black yeast fungal isolates in a biological soil crust based on genomes, phenotyping, and melanin regulation

Erin C. Carr<sup>1</sup>, Quin Barton<sup>2</sup>, Sarah Grambo<sup>3</sup>, Mitchell Sullivan<sup>1</sup>, Cecile M. Renfro<sup>4</sup>, Alan Kuo<sup>5</sup>, Jasmyn Pangilinan<sup>5</sup>, Anna Lipzen<sup>5</sup>, Keykhosrow Keymanesh<sup>5</sup>, Emily Savage<sup>5</sup>, Kerrie Barry<sup>5</sup>, Igor V. Grigoriev<sup>5,6</sup>, Wayne R. Riekhof<sup>1</sup>, Steven D. Harris<sup>7,8\*</sup>

1) University of Nebraska-Lincoln, School of Biological Sciences, Lincoln, Nebraska 68588; 2) University of Nebraska-Lincoln, Department of Biochemistry, Lincoln, Nebraska 68588; 3) Iowa State University, Roy J. Carver Department of Biochemistry, Biophysics, and Molecular Biology, Ames, Iowa 50011; 4) University of Nebraska-Lincoln, Department of Agronomy and Horticulture, Lincoln, Nebraska 68588; 5) US Department of Energy Joint Genome Institute Lawrence Berkeley National Laboratory, Berkeley California 94720; 6) Department of Plant and Microbial Biology, University of California Berkeley, Berkeley, California 94720; 7) Iowa State University, Department of Plant Pathology and Microbiology, Ames, Iowa 50011; 8) Iowa State University, Department of Entomology Ames, Iowa 50011

### Abstract

Black yeasts are polyextremotolerant fungi that contain high amounts of melanin in their cell wall and maintain a primarily yeast form. These fungi grow in xeric, nutrient deplete environments which implies that they require highly flexible metabolisms and the ability to form lichen-like mutualisms with nearby algae and bacteria. However, the exact ecological niche and interactions between these fungi and their surrounding community is not well understood. We have isolated two novel black yeast fungi of the genus *Exophiala*: JF 03-3F “Goopy” *E. viscosium* and JF 03-4F “Slimy” *E. limosus*, which are from dryland biological soil crusts. A combination of whole genome sequencing and various phenotyping experiments have been performed on these isolates to determine their fundamental niches within the biological soil crust consortium. Our results reveal that these *Exophiala* spp. are capable of utilizing a wide variety of carbon and nitrogen sources potentially from symbiotic microbes, they can withstand many abiotic stresses, and can potentially provide UV resistance to the crust community in the form of secreted melanin. Besides the identification of two novel species within the genus *Exophiala*, our study also provides new insight into the production and regulation of melanin in extremotolerant fungi.

### Background

Polyextremotolerant fungi are a polyphyletic group of fungi that can be broken down into black yeast fungi and microcolonial fungi. These two sub-types are distinct in their morphology; black yeast fungi are usually only yeasts but can be dimorphic, whereas microcolonial fungi are typically filamentous, pseudohyphal, or possess other unique morphologies such as spherical cells (Ametrano et al., 2017; De Hoog et al., 2003; Gostinčar et al., 2011). However, all polyextremotolerant fungi share the capacity to produce melanin, which presumably accounts for much of their polyextremotolerance. Most polyextremotolerant fungi are in the subdivision Pezizomycotina, residing mainly within Eurotiomycetes and Dothidiomycetes, but one could argue that any fully melanized fungus could be a polyextremotolerant fungi (Gostinčar et al., 2009).

Melanin is arguably a defining feature of polyextremotolerant fungi given that the form black colonies that are easily distinguishable from those formed by non-melanized fungi. Because of its association with the cell wall, melanin imbues polyextremotolerant fungi with resistance to multiple forms of stress.

41 Most commonly known is UV-resistance as melanin absorbs light in the UV part of the spectrum, but  
42 melanin is also capable of absorbing ROS, RNS, metals, reducing desiccation, and potentially using  
43 ionizing radiation as an energy source (Cordero & Casadevall, 2017; Dadachova et al., 2007). Collectively,  
44 these features of melanin are thought to enhance the ability of polyextremotolerant fungi to colonize  
45 habitats that are otherwise inhospitable to most forms of life.

46 The production of melanin is a key functional trait observed in fungi spanning the fungal kingdom (Bell &  
47 Wheeler, 1986; Zanne et al., 2020). The diverse protective functions of melanin (e.g., metal resistance,  
48 ROS and RNS tolerance, UV resistance) (Cordero & Casadevall, 2017; Gessler et al., 2014; Płonka &  
49 Grabacka, 2006; Zanne et al., 2020) underscores its broad utility in mitigating the impacts of stress  
50 despite the potential cost of its synthesis (Schroeder et al., 2020). Fungi are capable of producing three  
51 different types of melanin: pheomelanin, allomelanin, and pyomelanin, all of which have their own  
52 independent biosynthetic pathways. Allomelanin, is formed from the polymerization of 1,8-DHN, which  
53 requires the use of polyketide synthase for initial steps in production (Perez-Cuesta et al., 2020; Płonka  
54 & Grabacka, 2006) (**Figure 1**). Pyomelanin and pheomelanin share an initial substrate of Tyrosine, but  
55 pheomelanin derives from L-DOPA, whereas pyomelanin is created via tyrosine degradation (Perez-  
56 Cuesta et al., 2020; Płonka & Grabacka, 2006) (**Figure 1**). Allomelanin and pheomelanin are often  
57 referred to as DHN melanin and DOPA melanin respectively, given their chemical precursors.  
58 Unfortunately, due to the unique characteristics of melanins and their association with larger  
59 biomolecules, we do not know the complete structure of any type of melanin (Cao et al., 2021).  
60 However, given that we do know their chemical constituents, it is possible to draw some inferences  
61 about the relationship between structure and function of a particular type of melanin. For instance, out  
62 of the three types of melanin fungi can produce only pheomelanin has a chemical precursor, 5-CysDOPA,  
63 with both Nitrogen and Sulfur in its structure (Płonka & Grabacka, 2006). Notably, all three fungal  
64 melanins are synthesized via independent pathways, which enables the targeted use of chemical  
65 inhibitors to block one pathway without interfering with the others. For example, previous studies have  
66 extensively used the chemical melanin blockers kojic acid and phthalide to block pheomelanin and  
67 allomelanin respectively (Pal et al., 2014) (**Figure 1**). Use of these chemical blockers allowed previous  
68 studies to identify the primary melanin biosynthetic pathway employed by individual fungal species (Pal  
69 et al., 2014).

70 Polyextremotolerant fungi tend to occupy extreme niches such as rock surfaces, external brick and  
71 marble walls, soil surfaces, and even the inside of dishwashers (Gostinčar et al., 2009; Zupančič et al.,  
72 2016). Characteristic features of these environments includes the relative paucity of nutrients and the  
73 frequent presence of a community biofilm consisting of photosynthetic organisms and/or bacteria  
74 (Gostinčar et al., 2012). Strikingly, these species are rarely found alone in their habitats, which suggests  
75 that multi-species interactions between fungi, bacteria, and photosynthetic organism underlie the  
76 formation and function of these communities. That is, the ability of polyextremotolerant fungi to  
77 successfully adapt to their niche must depend on complex yet poorly understood interactions with other  
78 microbes..

79 We have isolated two polyextremotolerant fungi from a biological soil crust (BSC) at Jackman Flats  
80 Provincial Park in B.C., Canada. These novel fungi are of the genus *Exophiala*, this genus has previously  
81 been found in BSCs (Bates et al., 2006). Biological soil crusts are unique dryland biofilms that form on  
82 the surface of xeric desert soils where little to no plants are able to grow (Belnap, 2003; Belnap et al.,  
83 2001). They are notable for their extensive cyanobacteria population, which seeds the initial formation

84 of all biological soil crusts and creates the main source of nitrogen for the rest of the community  
85 (Belnap, 2002). Once the initial crust is established, it is then inundated with a consortium of bacteria,  
86 fungi, algae, archaea, lichens, and mosses (Bates et al., 2010; Lan et al., 2012; Maier et al., 2016). This  
87 community is a permanent fixture on the land they occupy unless physically disturbed, much like other  
88 biofilms (Belnap & Eldridge, 2001; Donlan & Costerton, 2002).

89 As a result of the desert conditions biological soil crusts reside in, the microbes found there are  
90 constantly exposed to extreme abiotic factors which they must tolerate simultaneously (Bowker et al.,  
91 2010). Some of these abiotic extremes are: UV radiation (especially at higher altitudes and closer to the  
92 poles) (Bowker et al., 2002), desiccation and osmotic pressures (Rajeev et al., 2013), and temperature  
93 fluctuations both daily and annually (Belnap et al., 2001; Bowker et al., 2002; Pócs, 2009). Microbes that  
94 reside in these biological soil crusts have therefore adapted mechanisms to withstand these abiotic  
95 extremes.

96 Extensive amount of research has been dedicated to certain members of the biological soil crust  
97 community, but one such less studied microbe has been the “free-living” fungal taxa. These fungi are  
98 non-lichenized yet are still thriving in an environment where there are no plants to infect or decompose,  
99 and no obvious source of nutrients besides contributions from the other members of the biological soil  
100 crust community. This would imply that even though these fungi are not lichenized per say, they would  
101 have to be engaging in lichen-like interactions with the biological soil crust community to obtain vital  
102 nutrients for proliferation. While the idea of transient interactions between non-lichenized fungi and  
103 other microbes has been floated by previous researchers in other systems (Gostinčar et al., 2012; Grube  
104 et al., 2015; Hom & Murray, 2014), it will be a difficult task to strongly confirm in biological soil crusts  
105 given their taxonomic complexity.

106 Biological soil crusts (BSCs) are a multi-kingdom biofilm on the surface of arid soils that exhibit little or  
107 no plant growth (Belnap et al., 2001). Despite the importance of microbial interactions in enabling the  
108 successful formation of BSCs in a niche characterized by poor nutrient and water availability, the fungal  
109 components of BSCs and their relative functions within the interaction network remain poorly  
110 understood. Here, we combine genome sequencing with computational tools and culture-based  
111 phenotyping to isolate and describe two new species of black yeast fungi associated with BSCs. We  
112 report on their carbon and nitrogen utilization profiles, stress responses, and lipid accumulation  
113 patterns. In addition, we characterize their capacity for melanin production and generate valuable  
114 insight into mechanisms that might be involved in regulating the synthesis of these compounds.

## 115 Methods

### 116 *Fungal Strains and Media*

117 Two novel species of fungi are described here: *Exophiala viscosium* and *Exophiala limosus*. Their  
118 genomes are deposited at DOE JGI in MycoCosm (*E. viscosium*:  
119 [https://mycoCosm.jgi.doe.gov/EurotioJF033F\\_1/EurotioJF033F\\_1.home.html](https://mycoCosm.jgi.doe.gov/EurotioJF033F_1/EurotioJF033F_1.home.html); *E. limosus*:  
120 [https://mycoCosm.jgi.doe.gov/EurotioJF034F\\_1/EurotioJF034F\\_1.home.html](https://mycoCosm.jgi.doe.gov/EurotioJF034F_1/EurotioJF034F_1.home.html)). Their type strains have  
121 been deposited to the Westerdijk institute. *E. viscosium* and *E. limosus* are typically grown in malt  
122 extract medium (MEA; see **Table 1** for media recipe) at room temperature in an Erlenmeyer flask at  
123 1/10<sup>th</sup> the volume of the flask, shaking at 200 rpm. Additional strains used were *Saccharomyces*  
124 *cerevisiae* ML440 and BY4741, and *E. dermatitidis* WT strain ATCC 34100. *S. cerevisiae* strains are grown

125 in Yeast Peptone Dextrose medium (YPD; see **Table 1** for media recipe), and *E. dermatitidis* is grown in  
126 MEA.

#### 127 *Fungal isolation and identification methods*

128 Fungi were isolated from public land in B.C., Canada. Soil samples were taken from the top 2 cm of  
129 biological soil crusts. A 0.1 g portion was re-suspended in water, ground with a sterile micropestle, and  
130 diluted with a DF of 10 till they reached 10,000x dilution. Each dilution was then spread out onto two  
131 different MEA petri plate containing either no antibiotics or containing: Ampicillin (100 mg/L),  
132 Chloramphenicol (50 mg/L), Gentamycin (10 mg/L), and Cycloheximide (400 mg/L). The plates were then  
133 incubated in a Percival light incubator at 23° C with a 12 hr light/dark cycle and examined daily using a  
134 dissection microscope to check for small black colonies. Once a potential black colony was seen, half of  
135 it was removed and transferred to a new MEA (no antibiotics) petri plate. It was vital to examine the  
136 plates daily, because even in the presence of antibiotics many unwanted fast-growing microbes would  
137 grow on the plates and cover up the slower growing polyextremotolerant fungal colonies. Once a pure  
138 culture of each isolate was grown up (approximately 2 weeks), they were preserved in 30% Glycerol and  
139 stored in the -80° C freezer. DNA sequencing of amplified ITS sequences was used to identify the  
140 isolates. DNA was extracted using the Qiagen DNeasy Powersoil DNA extraction kit. Primers used to  
141 isolate the ITS region were: ITS1- (5'-TCC GTA GGT GAA CCT GCG G-3') and ITS4- (5'-TCC TCC GCT TAT  
142 TGA TAT GC-3') (White et al., 1990). A BioRad MJ Mini Personal Thermal Cycler was used, with the  
143 program set as: 1) 95° C for 5:00 (5 minutes), 2) 94° C for 0:30 (30 seconds), 3) 55° C for 0:30, 4) 72° C for  
144 1:30, 5) Return to 2 35 times, 6) 72° C for 5:00. Resulting PCRs were then checked via gel electrophoresis  
145 in 1% agar run at 80 V for 1 hr. Isolated ITS regions were sequenced using the Eurofins sequencing  
146 facility, and the sequences were subsequently BLASTed against the NCBI database to look for potential  
147 matches.

#### 148 *DNA extraction and RNA extraction for whole genome sequencing*

149 A CTAB-based DNA extraction method was performed to obtain high molecular weight DNA for whole  
150 genome sequencing. The DNA extraction method used was derived from (Cubero et al., 1999). Changes  
151 to the original protocol include: switching PVPP for the same concentration of PVP, use of bead beating  
152 tubes with liquid nitrogen-frozen cells and the extraction buffer instead of a mortar and pestle for  
153 breaking open the cells, and heating up the elution buffer to 65° C before eluting the final DNA. These  
154 changes were made to optimize the protocol for liquid-grown yeast cells instead of lichen material. Cells  
155 for the DNA extraction were grown up in 25 mL of liquid MEA in 250 mL Erlenmeyer flasks for 5 days, 1  
156 mL of those grown cells was used for the DNA extraction after washing with water.

157 RNA was obtained using the Qiagen RNeasy mini kit (Cat. No. 74104). Cells were grown in 25 mL of three  
158 different liquid media types (MEA, YPD, and MNV) in 250 mL Erlenmeyer flasks at room temperature for  
159 5 days, and 1-2 mL of cells were used for the RNA extraction. Cells were washed with DEPC-treated  
160 water and flash frozen in liquid nitrogen in 1.5 mL microcentrifuge tubes. RNA extraction was then  
161 performed according to the methods by the RNeasy kit.

#### 162 *Genome assembly and annotation*

163 Both genomes and transcriptomes were sequenced using Illumina technology. For transcriptomes, a  
164 plate-based RNA sample prep was performed on the PerkinElmer Sciclone NGS robotic liquid handling

165 system using Illuminas TruSeq Stranded mRNA HT sample prep kit utilizing poly-A selection of mRNA  
166 following the protocol outlined by Illumina in their user guide:  
167 [https://support.illumina.com/sequencing/sequencing\\_kits/truseq-stranded-mrna.html](https://support.illumina.com/sequencing/sequencing_kits/truseq-stranded-mrna.html), and with the  
168 following conditions: total RNA starting material was 1 ug per sample and 8 cycles of PCR was used for  
169 library amplification. The prepared libraries were quantified using KAPA Biosystems' next-generation  
170 sequencing library qPCR kit and run on a Roche LightCycler 480 real-time PCR instrument. The libraries  
171 were then multiplexed and prepared for sequencing on the Illumina NovaSeq sequencer using NovaSeq  
172 XP v1 reagent kits, S4 flow cell, following a 2x150 indexed run recipe.

173 Using BBDuk (<https://sourceforge.net/projects/bbmap/>), raw reads were evaluated for artifact  
174 sequence by kmer matching (kmer=25), allowing 1 mismatch and detected artifact was trimmed from  
175 the 3' end of the reads. RNA spike-in reads, PhiX reads and reads containing any Ns were removed.  
176 Quality trimming was performed using the phred trimming method set at Q6. Finally, following  
177 trimming, reads under the length threshold were removed (minimum length 25 bases or 1/3 of the  
178 original read length - whichever is longer). Filtered reads were assembled into consensus sequences  
179 using Trinity ver. 2.3.2 (Grabherr et al., 2011).

180 For genomes, DNA library preparation for Illumina sequencing was performed on the PerkinElmer  
181 Sciclone NGS robotic liquid handling system using Kapa Biosystems library preparation kit. 200 ng of  
182 sample DNA was sheared to 300 bp using a Covaris LE220 focused-ultrasonicator. The sheared DNA  
183 fragments were size selected by double-SPRI and then the selected fragments were end-repaired, A-  
184 tailed, and ligated with Illumina compatible sequencing adaptors from IDT containing a unique  
185 molecular index barcode for each sample library. The prepared libraries were quantified using KAPA  
186 Biosystems' next-generation sequencing library qPCR kit and run on a Roche LightCycler 480 real-time  
187 PCR instrument. The quantified libraries were then multiplexed with other libraries, and the pool of  
188 libraries was then prepared for sequencing on the Illumina HiSeq sequencing platform utilizing a TruSeq  
189 paired-end cluster kit, v4, and Illumina's cBot instrument to generate a clustered flow cell for  
190 sequencing. Sequencing of the flow cell was performed on the Illumina HiSeq2500 sequencer using  
191 HiSeq TruSeq SBS sequencing kits, v4, following a 2x150 indexed run recipe.

192 An initial assembly of the target genome was generated using VelvetOptimiser version 2.1.7 (3) with  
193 Velvet version 1.2.07 (Zerbino & Birney, 2008) using the following parameters; "--s 61 --e 97 --i 4 --t 4, --  
194 o "-ins\_length 250 -min\_contig\_lgth 500"". The resulting assembly was used to simulate 28X of a 2x100  
195 bp 3000 +/- 300bp insert long mate-pair library with wgsim version 0.3.1-r13  
196 (<https://github.com/lh3/wgsim>) using "-e 0 -1 100 -2 100 -r 0 -R 0 -X 0 -d 3000 -s 30". 25X of the  
197 simulated long mate-pair was then co-assembled together with 125X of the original Illumina filtered  
198 fastq with AllPathsLG release version R49403 (Gnerre et al., 2011) to produce the final nuclear  
199 assembly. The genome was annotated using JGI Annotation pipeline (Grigoriev et al., 2013). The  
200 assemblies and annotations of bot genomes are available at the fungal genome portal MycoCosm  
201 ((Grigoriev et al., 2014); <https://mycocosm.jgi.doe.gov>) and in the DDBJ/EMBL/GenBank repository  
202 under accessions XXXXXXXX and XXXXXXXX.

### 203 *Mating type locus identification*

204 Mating loci for *E. viscosium* and *E. limosus* were determined using the methods described by Teixeira et  
205 al. (2017). Genes known to flank the MAT loci of most Chaetothyriales species include: *APN2*, *SLA2*,  
206 *APC5*, and *COX13*. The protein sequences of these genes from *Aspergillus nidulans* were used to BLASTP



207 against the genomes of the new fungi. These gene sequences were obtained from Aspergillus Genome  
208 Database and BLASTed using JGI's Mycocosm. Once those genes were found, analysis of upstream and  
209 downstream flanking genes was performed until the mating gene MAT1-1 was located. Genes close to  
210 MAT1-1 and within the span of genes listed above were considered part of the MAT locus.

## 211 Phenotyping experiments:

### 212 *Budding Pattern determination*

213 Protocols for observing the budding patterns of these new species were derived from methods in  
214 (Mitchison-Field et al., 2019). A 1:1:1 ratio of Vaseline, Parafin, and Lanolin (VALAP) was combined in a  
215 glass bottle and heated to 115° C to melt completely and kept at room temperature for later use.  
216 Heated solid MEA was aliquoted into a 50mL tube for agar slab making. Isolates were grown in liquid  
217 MEA for 5 days prior to inoculation of slides. First, the VALAP was brought back up to 115° C to melt  
218 completely for application. Then 5 µL of the 5-day old cells were diluted in 995 µL of liquid MEA. Agar  
219 slabs of MEA were made by microwaving the 50 mL tube of solid MEA until it melted, then pipetting 1  
220 mL of the hot agar into a 1 cm x 2 cm mold formed out of cut strips of silicone and laid down in a sterile  
221 petri dish. This agar slab was allowed to solidify and was then cut in half to be 1 cm x 1 cm. Both the  
222 cover slip and the slide were wiped down with ethanol to ensure clean and sterile growth conditions for  
223 the cells. 8 µL of the diluted cells was pipetted onto the center of the sterile slide, then one square of  
224 the agar slab was carefully placed on top of the cells in media, 8µL of MEA was pipetted onto the top of  
225 the agar slab, and the coverslip was placed over the agar slab. Using a small paintbrush, the melted  
226 VALAP was carefully painted onto the gap between the coverslip and the microscope slide to seal off the  
227 coverslip. Finally, a 23-gauge needle was used to poke holes in the solidified VALAP to allow for gas  
228 exchange.

229 The slide was then placed with the slide facing down onto the inverted microscope EVOS fl. Once an  
230 adequate number of cells was observed in frame, the cells were allowed to settle for 2 hours before  
231 imaging began. Images were then automatically taken every 30 mins for 72 hours. Videos of the budding  
232 pattern were created using Adobe Premiere Pro.

### 233 *Growth of E. viscosium and E. limosus on different medias*

234 Eight different fungal media were used to observe the growth of these novel fungi. These media have  
235 been used for identification purposes and will be useful for future identification of these species from  
236 other locations. Media used in this experiment were: MAG, MEA, MN, MNV, MN+NAG, PDA, Spider,  
237 YPD, V8 (**Table 1**). Both isolates were first grown in 25 mL of liquid MEA at room temperature, shaking at  
238 200 rpm for 5 days. Then 1 mL of each species was aliquoted and washed 3 times with water. Washed  
239 cells were then applied to the media in three ways: 5 µL spotting (pipetting 5 µL of cells onto the plate),  
240 toothpick poking (poking a sterile toothpick tip into the suspended cells and then onto a plate), and  
241 metal loop streaking (placing sterile metal loop into suspended cells, then spreading cells onto plate in a  
242 decreasing manner). This provided us with different plating techniques that could potentially yield  
243 different morphologies.

### 244 *Carbon Utilization*

245 Carbon utilization of each isolate was determined using a BioMerieux ID C32 carbon utilization strip (Cat.  
246 No. 32200-1004439110). These strips have 30 different carbon sources in individual wells, one well with

247 no carbon source for a negative control, and one well with Ferric citrate. The inoculated strips were kept  
248 in a plastic container with a lid and lined with moist paper towels to reduce drying. The initial inoculum  
249 of cells was prepared in 25 mL of MEA shaking at room temp for 5 days. Inoculation of the strips was  
250 done according to the instructions provided by the vendor, and each strain was inoculated in three  
251 separate strips for triplicate replication. Cells were diluted to the kit requirement of McFarland standard  
252 #3 before starting the inoculum. Growth in the ID strip lasted 10 days before evaluation. Growth in each  
253 well was observed and evaluated by eye. Each well was compared to the negative control (no carbon)  
254 and the positive control (dextrose). Initial growth was evaluated on a: +, V, -, and - - scale. If a well had  
255 the same growth as the negative control it was given a “-“, meaning no growth; if the well had less  
256 growth than the negative control it was given a “- -“, meaning growth was inhibited by the carbon  
257 source; if a well had growth equal to or more than the dextrose well then it was given “+“, meaning it  
258 was capable of growth on the carbon substrate; finally if the well was in between the negative control  
259 and positive control it was given a “V“, for variable growth. Nuances of the fungal growth on individual  
260 carbon sources required a more gradual scale, and so scores were adjusted to form a range of 1-5 to  
261 allow for more easy average calculation between the three replicates.

#### 262 *Nitrogen utilization*

263 Nitrogen utilization tests were performed using ten different nitrogen conditions. 100 mM was the  
264 concentration used for all compounds that contained one nitrogen atom per molecule: Proline,  
265 Ammonium tartrate dibasic, Serine, Sodium Nitrate, Glycine, Glutamate, and Aspartate; 50 mM was the  
266 concentration used for Urea because it has two atoms of nitrogen per molecule; 1% w/v of Peptone was  
267 used as a positive control; and no nitrogen was added as a condition for a negative control (**Table 2**).  
268 Liquid minimal media (MN) with MN salts (not 20x Nitrate salts) was used with the varying nitrogen  
269 sources to ensure that no alternative nitrogen source would be available to the fungi. Fungi were first  
270 grown up in liquid MEA for 5 days at room temperature to reach maximum density. Then, 1 mL of cells  
271 was removed and washed three times with water. 99  $\mu$ L of each medium was added to six wells in a 96-  
272 well plate, for six replicates, and 1  $\mu$ L of the washed cells was added to each well. 100  $\mu$ L of each  
273 medium was also added to one well each without cells to blank each condition, because the different  
274 nitrogen sources created different colors of medium. Daily growth was measured from day 0 to day 7 at  
275 420 nm, using the BioTek Synergy H1 hybrid spectrophotometer.

#### 276 *Optimal growth temperature and range of growth temperatures*

277 To determine the temperature resistance range and optimal growth temperature for each isolate, we  
278 grew them in 4° C, 15° C, Room temp at 23° C (i.e., ambient room temperature), 28° C, 37° C, and 42° C.  
279 Isolates were first grown up in 25 mL of MEA for 5 days at room temperature to maximum density. Then  
280 1 mL of cells was removed, and a 10x serial dilution was made from 0x to 100,000x, using pre-filled  
281 1.5mL tubes with 900  $\mu$ L of MEA and adding 100  $\mu$ L of the previous tubes each time. Then 5  $\mu$ L of each  
282 serial dilution was spotted onto a square MEA plate which allowed us to determine the carrying capacity  
283 of each isolate at the different temperatures. Plates were kept at their respective temperatures for 7  
284 days before observations were made, however the 37° C and 42° C incubators required cups of water  
285 inside of them to prevent the plates from dehydrating. Plates grown in 42° C and 37° C were then  
286 allowed to grow at room temp for up to a week to determine if the isolates died at these temperatures  
287 or if their growth was just arrested.

#### 288 *UV resistance*

289 Resistance to UV light was observed to determine if these black fungi, with highly melanized cell walls  
290 and constant exposure to sunlight in their natural habitat, were in fact UV resistant. To determine this,  
291 we used the UVP HL-2000 HybriLinker UV crosslinker as our source of UV light. Individual isolates were  
292 inoculated in 25 mL of MEA and let grow under shaking conditions at 200 rpm for 5 days at room  
293 temperature to reach maximum density. 100  $\mu$ L of this culture was then spread out onto 6 MEA plates,  
294 using a glass spreader. Three plates were kept as the control growth, to compare to the three other  
295 plates which were exposed to the UV light. Experimental plates were placed inside of the crosslinker  
296 with their lids taken off, lids kept inside the crosslinker, and both lids and petri dishes facing up. Then  
297 the plates were exposed to 120 seconds of UV light from a distance of 9.5 cm to the light source at  
298 10,000  $\mu$ J/cm<sup>2</sup> (254 nm) (Frases et al., 2007). We then wrapped all plates in aluminum foil and placed  
299 them in the Percival light incubator set at 23°C for 2 days. After 2 days the plates were removed from  
300 the aluminum foil and left in the incubator for 5 more days before final observations. To determine  
301 whether a particular isolate was resistant to UV exposure, the growth of the isolate exposed to UV was  
302 compared to the control growth.

### 303 *Metal Resistance*

304 Metal resistance is a relatively universal trait in many polyextremotolerant fungal species. Due to the  
305 under-studied nature of this particular characteristic in biological soil crusts and fungi, we decided to  
306 test if any of our isolates were resistant to any heavy metals which would indicate possible  
307 bioremediation capacity. In order to test metal resistance, we used the antibiotic disc method by  
308 aliquoting metal solutions onto paper discs and observing zones of clearance. Metals and concentrations  
309 used are listed in **Table 3** For testing, 5  $\mu$ L of each metal solution was aliquoted onto a dry autoclaved  
310 Wattman filter paper disc. These discs were then allowed to air dry and kept at 4° C for up to a week.  
311 Initial growth of the fungal isolates was done in 25 mL of MEA, shaking at 200 rpm for 5 days at room  
312 temperature. We then spread 100uL of each fungal isolate onto 100 mm sized MEA plates using a glass  
313 spreader to create a lawn. Using flame sterilized tongs our metal paper discs were placed onto the  
314 center of the petri dish on top of the fungal lawn and lightly pressed down to ensure the metal disc was  
315 touching the plate completely. These plates were then placed in the Percival light incubator at 23° C  
316 with a 12 hr light/dark cycle for up to 2 weeks. Once the plates were observed to have grown enough (1-  
317 2 weeks), the zone of clearing was measured in cm. Generally, large zones of clearing indicated  
318 sensitivity to the metal, whereas zones of reduced size were consisted with resistance to the metal.

### 319 *Lipid profiles*

320 Comparison of the lipid production of *S. cerevisiae*, *E. dermatitidis*, *E. viscosium*, and *E. limosus* was  
321 performed in the presence of fermentable vs. non-fermentable sugars in high and low nitrogen In order  
322 to test the lipid profile and growth changes associated with fermentable and non-fermentable sugars  
323 and differences in nitrogen source amounts we grew all four species in four different media types. 1)  
324 MEA; 2) MEA + 20 g/L of peptone instead of 2 g/L; 3) MEA with the dextrose replaced with the same  
325 weight amount of glycerol; 4) MEA with glycerol instead of dextrose and 20 g/L of peptone instead of 2  
326 g/L. All four fungal species were first inoculated in 25 mL of liquid MEA in a 250 mL Erlenmeyer flask and  
327 shaken at 200 rpm for 5 days at room temperature to reach peak density. Then 100  $\mu$ L was inoculated  
328 into 5 mL of each media in a size 25 mm tube, placed in a roller drum and allowed to grow at room  
329 temperature for 5 days. The inoculum of each fungus was aliquoted to ensure the same wet weight of  
330 each organism was present to compare lipid amounts across the four species.



331 To observe their lipid profile, we performed a standard lipid extraction. Cells were pelleted and re-  
332 suspended in 2 mL of methanol inside of glass tubes. Tube openings were covered in Durafilm before  
333 applying the lid of the tube, then samples were boiled for 5 minutes and let cool for 10 minutes. Then 2  
334 mL of chloroform and 1.6 mL of 0.9% NaCl were added, and the tubes were vortexed to fully mix. Tubes  
335 were then centrifuged at 5000 rpm for 5 minutes to separate the layers. The bottom lipid layer of the  
336 suspension was removed and placed in a new glass tube which was then dehydrated using nitrogen gas  
337 till the samples became fully dry. Dehydrated samples were then re-suspended with 100  $\mu$ L of a 9:1 ratio  
338 of chloroform : methanol to run the thin layer chromatography (TLC) with. For all samples except the *S.*  
339 *cerevisiae*, 7  $\mu$ L of the lipid suspension was used to dot the TLC. For *S. cerevisiae*, 10  $\mu$ L of the lipid  
340 suspension was needed. The solvent systems used for TLC were Chloroform : methanol : glacial acetic  
341 acid: water 85:12.5:12.5:3 for the Polar lipid solvent system, and Petroleum ether : Diethyl ether : acetic  
342 acid 80:20:1 for the neutral lipid solvent system. The TLC plates were loaded with 7 or 10  $\mu$ L of the re-  
343 suspended samples, and they were placed in the Polar solvent system for approximately 30 minutes  
344 (half-way up the plate) before transferring to the Neutral Lipid solvent system in a separate container till  
345 the solvent front reached just a few cm below the top of the plate. The plate was then removed and  
346 dried for 15 minutes, until the solution on the plate was no longer volatile, and the plate was placed in  
347 the presence of iodine (Sigma-Aldrich cat. No. 207772) in a glass chamber for 5 minutes until all the  
348 lipids were visible. The plates were then immediately placed in plastic covers and scanned and  
349 photographed for visualization and documentation.

## 350 Melanin experiments:

### 351 *Melanin biosynthesis gene annotation*

352 Melanin biosynthesis in fungi occurs via three different pathways: the DHN pathway which creates  
353 allomelanin, the DOPA pathway which creates pheomelanin, and the tyrosine degradation pathway  
354 which creates pyomelanin (Cao et al., 2021; Gessler et al., 2014). Most fungal species only contain one  
355 melanin biosynthetic pathway, but there are many species in Pezizomycotina, particularly in the genera  
356 *Aspergillus* and *Exophiala*, which are capable of producing all three forms of melanin (Teixeira et al.,  
357 2017). For that reason, we decided to manually annotate the genes involved in all three melanin  
358 biosynthetic pathways in *E. viscosium* and *E. limosus* to determine if they too possessed all three  
359 melanin biosynthetic pathways. In all cases, the relevant *A. niger* genes were used as queries (Teixeira et  
360 al., 2017). Protein sequences for each gene were found using the Aspergillus genome database and were  
361 tested using BLAST-P against the filtered model proteins database of *E. viscosium* and *E. limosus* in  
362 MycoCosm ([https://mycocosm.jgi.doe.gov/pages/blast-query.jsf?db=EurotioJF033F\\_1](https://mycocosm.jgi.doe.gov/pages/blast-query.jsf?db=EurotioJF033F_1);  
363 [https://mycocosm.jgi.doe.gov/pages/blast-query.jsf?db=EurotioJF034F\\_1](https://mycocosm.jgi.doe.gov/pages/blast-query.jsf?db=EurotioJF034F_1)). Since *A. niger* contains  
364 paralogs for some melanin biosynthetic genes, all genes listed in (Teixeira et al., 2017) were used as  
365 queries for BLAST searches. Once the melanin biosynthetic genes in *E. viscosium* and *E. limosus* were  
366 identified, their highest matching protein sequences were then reverse BLASTed to the *A. niger* genome  
367 to determine the reciprocal best hit and ensure true homology.

### 368 *Regulation of Melanin production using chemical blockers*

369 Once it was established that both isolates contain the potential for production of all three fungal  
370 melanins, the effects of known chemical blockers of the DHN and DOPA melanin pathways was used to  
371 investigate melanin production. DHN melanin blocker Phthalide and the DOPA melanin blocker Kojic

372 acid were both used in hopes of blocking melanin production in these isolates. Stock solutions were  
373 made according to (Pal et al., 2014): Phthalide was diluted in 70% ethanol, and Kojic acid in DMSO.  
374 Three separate experiments were performed using these melanin blockers, to determine which method  
375 would provide the most informative results.

376 The first was the disc diffusion method whereby Whatman filter paper discs were autoclaved and  
377 impregnated with 5  $\mu$ L of either 10 mM of Phthalide or 10 mg/mL of Kojic acid. Impregnated filter paper  
378 discs were then placed on top of freshly spread lawns of either isolates on both MEA and YPD. Lawns  
379 were of 50:50 diluted 5-day old cells grown in MEA, and 100  $\mu$ L of this dilution was spread onto the petri  
380 plates with a glass hockey stick. These plates were then grown at 23° C with 12 hr light/dark cycles for 5  
381 days. Additionally, both a Kojic acid disc and Phthalid discs were placed on fungal lawns ~4 cm apart  
382 simultaneously to observe their specific melanin-blocking capabilities on the same cells.

383 Next, we tried adding the melanin blockers directly to the medium as was done in (Pal et al., 2014).  
384 Since melanin is more universally distributed in *Exophiala* cells compared to *Aspergillus* cells, we decided  
385 to use the highest concentration of both Kojic acid and Phthalide that was used by (Pal et al., 2014),  
386 which was 100 mM of each compound. This concentration was added to both solid YPD and MEA after  
387 autoclaving, individually and combined. These plates were then used for two forms of growth  
388 experiments. Alternatively, we spread a lawn onto YPD and MEA with and without Kojic acid, Phthalide,  
389 and both compounds at 100 mM each. Finally, we performed a 10x serial dilution of both *E. viscosium*  
390 and *E. limosus* up to 10,000x diluted, and spotted 5  $\mu$ L of each dilution onto MEA plates with and  
391 without Kojic acid, Phthalide, and both compounds. We let both growth experiments grow at 23° C for 5  
392 days with a 12 hr light/dark cycle.

### 393 *Melanin Extraction and spectrophotometric measurements*

394 Extraction of melanin from a variety of sources has been performed with two main categories of  
395 methods: chemical extraction and enzymatic extraction (Pralea et al., 2019). We were unsure which  
396 extraction method would be most applicable to these species, so both were performed. The enzymatic  
397 extraction method that was used came from (Rosas et al.) (2000). Alternatively, the chemical extraction  
398 method, which has been used more extensively in previous work, was derived from (Pal et al., 2014).  
399 Adjustments to the Pal et al. method included the initial precipitation of melanins in HCl took multiple  
400 days instead of overnight, and stopping the protocol when 2M NaOH was added to the extracted  
401 melanin. We did not continue on to re-precipitation and drying of the melanin as this product did not  
402 reprecipitate in any solvents used.

403 Exact methods are as follows. 10 mL of filter sterilized supernatant was transferred into a 50 mL  
404 centrifuge tube, and 40 mL of 6M HCl was added to the tube. The filtrate was then allowed to  
405 precipitate out for up to two weeks. Precipitated tubes were then centrifuged at 4000 rpm for 3  
406 minutes, and the resulting supernatant was discarded. The pellet was washed with 2 mL of dd H<sub>2</sub>O,  
407 vortexed, centrifuged, and the supernatant discarded. Then 3 mL of 1:1:1 Chloroform : ethyl acetate :  
408 ethanol was added to the samples and vortexed vigorously to ensure as much re-distribution of the  
409 melanin was accomplished. The tubes were then centrifuged again, and any resulting clear layers (top  
410 and or bottom) were discarded, leaving behind the dark layer. 2 mL of water was added to the sample  
411 for washing, and the tubes were centrifuged again, and the entire supernatant was discarded. Finally, 1  
412 mL of 2M NaOH was added to each sample to allow for a standard volume added even if the melanin  
413 amount and therefore the final volume varied.

414 Samples suspended in 1 mL of 2M NaOH were then diluted 5  $\mu$ L into 195  $\mu$ L of 2M NaOH into a 96-well  
415 plate, with a 200  $\mu$ L 2M NaOH blank well. These diluted samples were then read using the BioTek  
416 Synergy H1 hybrid spectrophotometer. The settings were for a full spectrum read from 230 nm to 700  
417 nm. However, the machine could not read ODs above 4.0, and therefore only data from 300 nm to 700  
418 nm was used.

#### 419 *Melanin secretion and its concentration in the supernatant*

420 To confirm that *E. viscosium* and *E. limosus* are actively secreting melanin, as opposed to dead cells  
421 lysing and releasing it, we grew both species and took daily aliquots for melanin extraction. Additionally,  
422 we wanted to compare the melanin secretion capabilities of these species to *E. dermatitidis* for a  
423 baseline comparison. All three species were grown up in liquid MEA shaking at room temperature for 5  
424 days. Then 2 mL of cells were washed with water three times. 500  $\mu$ L of washed cells were then  
425 inoculated into 100 mL of MEA and YPD in 500 mL flasks. We let the cells grow at 23° C shaking at 200  
426 rpm for 7 days, removing 11 mL of cells and supernatant daily and pipetting them into 15 mL centrifuge  
427 tubes. The tubes of cells were then centrifuged at 3000 rpm for 5 minutes, the supernatant was  
428 removed, filter sterilized through a 0.2  $\mu$ m filter, and placed into a new tube. We filter sterilized the  
429 supernatant to ensure that no cells remained in the supernatant, therefore all of the melanin extracted  
430 came only from secreted melanin. Melanin was then extracted using the chemical method explained  
431 above. Resulting pure melanin for all samples was read with the full spectrum as stated above, and both  
432 standard OD and log scale graph were created to confirm the existence of melanin.

#### 433 *Increasing amounts of peptone*

434 To assess the role of nitrogen levels in melanin secretion, we initially switched the concentration of  
435 peptone added to YPD and MEA media; the new media would be: YPD + 0.2% peptone, and MEA + 2%  
436 peptone. We then took both *E. viscosium* and *E. limosus* that was grown in liquid MEA for 5 days shaking  
437 at room temperature, and plated out the species onto these new media using the same technique as  
438 described above for growth comparison on different media. To determine if a more gradual increase in  
439 peptone would correlate with a gradual secretion of melanin, we took the base media of MEA (solid)  
440 and changed the concentration of peptone to: 0.1%, 0.5%, 1%, 1.5%, 2%, 2.5%, 3%, 3.5%, 4%, and 5%.  
441 We then spotted 5  $\mu$ L of both species onto the plates after performing a 10x serial dilution up to 10,000x  
442 dilution. The plates were grown at 23° for 10 days with a 12 hr light/dark cycle.

#### 443 Albino mutant experiments:

##### 444 *Creation of EMS mutants and annotation of their mutations*

445 Genetic modification of these species has not been established yet. However, random mutagenesis via  
446 chemical mutagens was performed in the hopes of finding albino mutants, to provide greater insight  
447 into the regulation of melanin production. UV exposure which is used frequently as a mutagen for  
448 random mutagenesis was attempted, but never resulted in phenotypically distinct mutants or albino  
449 mutants. Instead, we used ethyl methyl sulfonate to induce G:C to A:T mutations randomly within the  
450 genomes of our species. This was performed using the method by (Winston, 2008). Albino mutants and  
451 other interesting pigmentation or morphological mutants were isolated from the resulting mutagenesis,  
452 and their DNA was extracted using the same CTAB extraction manner stated above. Their DNA was then  
453 sent to the Microbial Genome Sequencing Center (MiGS) for genome re-sequencing and base-called

454 against the wild-type DNA. Resulting mutations were then manually annotated using the JGI MycoCosm  
455 genome “search” tool to determine if any genes were disrupted by the mutations to cause the  
456 phenotype observed.

#### 457 *Recovery of melanin production in albino mutants*

458 Following recovery of our albino mutant, we attempted to restore melanin production via chemical  
459 induction of the other melanin biosynthetic pathways. We did this using hydroxyurea (HU) and L-DOPA.  
460 Hydroxyurea has been shown to enhance melanin production in *E. dermatitidis*, and L-DOPA is needed  
461 for certain fungi to produce melanized structures (Dadachova et al., 2007; Schultzhaus et al., 2020). Both  
462 YPD and MEA medium was made up and 20 mM of HU, 1 mM of L-DOPA, or 1 mM of 1,8-DHN was  
463 added to the medium after autoclaving. Our albino mutants were then grown up in the same way as our  
464 wild type cells. 5 µL of grown cells were spotted onto these media with added compounds and they  
465 were grown for 10 days at 23° C 12 hr light/dark cycle.

## 466 Results

### 467 Description of *Exophiala viscosium* and *Exophiala limosus*

468 *Exophiala viscosium* was isolated from Jackman Flats Provincial Park in B.C. Canada. Initial ITS  
469 sequencing was performed to obtain potential taxonomic matches. BLAST results to its ITS sequence  
470 matched 97.57% to “*Exophiala nigra* strain CBS 535.95” accession number: MH862481.1. Whole  
471 genome sequencing and further phylogenetic analyses subsequently revealed that *E. viscosium* is a  
472 novel species closely related to *E. sideris*.

473 Morphological characterization of *E. viscosium* demonstrated that compared to *E. dermatitidis*, *E.*  
474 *viscosium* has much darker pigmentation, and is also a more viscous cell culture. When scraping a colony  
475 off the plate it comes up like stretchy tar usually leaving a string of cells hanging off the sterile loop. *E.*  
476 *viscosium* does not disperse in water easily when re-suspending, but it does pellet easily at 10,000x g for  
477 1 minute. When grown up on a MEA plate for a week or more, it will begin to form a rainbow sheen like  
478 an oil slick (**Figure 2A**). Hyphal growth will begin to form into the agar when the plate is left alone at  
479 room temperature for more than three weeks. Interestingly, secretion of melanin into the agar can be  
480 observed after two weeks on MEA and one week on YPD plates. In liquid culture, this occurs more  
481 quickly, with melanin observed in the supernatant starting at 5 days in MEA and 3 days in YPD. The  
482 cellular morphology of *E. viscosium* is that of a true yeast. It has large tear-drop shaped cells that usually  
483 bud one at a time but can sometimes bud 2-3 times simultaneously (**Figure 2B**). Lipid bodies are  
484 frequently observed, as the large circles within cells (**Figure 2B**), and have been confirmed by Nile red  
485 staining (data not shown). This isolate grows to its maximum density in 7 days at 23° C in 25 mL of MEA  
486 in a 250 mL Erlenmeyer flask shaken at 200 rpm. *Exophiala viscosium* was originally referred to as  
487 “Goopy” due to the nature of its morphology. Accordingly, we have formally named it *Exophiala*  
488 *viscosium* for the Latin term of viscous.

489 *Exophiala limosus* was isolated from a biological soil crust on public land in B.C. Canada. The ITS region  
490 of *E. limosus* most strongly matched “*Exophiala nigra* strain CBS 535.95” accession number:  
491 MH862481.1 with an identify of 97.67%. Although both *E. viscosium* and *E. limosus* have similar  
492 phylogenetic placement, their cellular morphology and budding patterns differ drastically (**Figure 2** and  
493 **Figure 4**). As seen in **Figure 2D**, the cellular morphology of *E. limosus*’ resembles that of *Horatea*

494 *werneckii* as observed by Mitchison-Field et al. (2019). Cells are more elongated than *E. viscosium*, and  
495 when grown up to maximum density pipetting becomes difficult due to large clumps of cells formed by  
496 its more filamentous growth pattern. Both isolates have the consistency of sticky black tar, and an  
497 iridescent shine that forms after a week on an MEA plate. *Exophiala limosus* also fails to easily disperse  
498 when suspended in water but can be readily pelleted. These observations and the prominence of lipid  
499 bodies within the cells (**Figure 2D**) suggests that lipid-derived compounds could cause their sticky, water  
500 repelling, iridescent nature. This isolate grows to its maximum density in 7 days at 23° C in 25 mL of MEA  
501 in a 250 mL Erlenmeyer flask shaken at 200 rpm. Originally, *E. limosus* was named “Slimy” to reflect its  
502 colony characteristics. Accordingly, we have formally named it *Exophiala limosus* for the Latin term of  
503 muddy. Notably, *E. limosus* possesses a looser pellet and is less refractory to re-suspension than *E.*  
504 *viscosium*.

#### 505 *Genome description*

506 The genome assembly sizes of these two novel *Exophiala* species are: 28.29 Mbp for *E. viscosium* and  
507 28.23 Mbp for *E. limosus* (**Table 4**). These sizes are similar to other yeasts in the genus *Exophiala*, and  
508 are only a bit smaller than their closest relative *E. sideris* (29.51 Mbp). Although the genomes are  
509 smaller than *E. sideris*, predicted gene content is relatively higher; 11344 for *E. viscosium* and 11358 for  
510 *E. limosus* as compared to 11120 for *E. sideris* (**Table 4**). However, *E. sideris* appears to possess longer  
511 genes, transcripts, exons, and introns compared to *E. limosus* and *E. viscosium*, which could also  
512 contribute to the gene number to genome size differences (**Table 4**). *E. viscosium* contains the highest  
513 GC% amongst the *Exophiala* species listed in **Table 4**. *E. viscosium*'s GC content is even higher than *E.*  
514 *limosus* by 2.65%, which given their genetic similarities is quite interesting.

#### 515 *Mating type*

516 *Exophiala* species are one of the many fungal genera whose mating capabilities remain incompletely  
517 understood and vary across the genus (Teixeira et al., 2017). The closest species to *E. viscosium* and *E.*  
518 *limosus* is *E. sideris*, within which both mating types have been characterized (Teixeira et al., 2017).  
519 Given the known order of genes in regions flanking the MAT locus in *Exophiala* species, we used  
520 comparative approaches to determine the mating identities of the sequenced *E. viscosium* and *E.*  
521 *limosus* isolates, and to look for possible evidence of homothallism. Homologues of the genes APN2,  
522 SLA2, APC5, COX13, and MAT1 (MAT1-1/alpha) in *E. viscosium* and *E. limosus* were identified via BLAST  
523 searches. We found that APN2 and SLA2 flank the MAT1-1 gene, and that both species contain the  
524 Herpotrichalleaceae-specific mating gene MAT1-1-4 (**Figure 3**). These results are not surprising, in that  
525 this is the exact same order of these genes in *E. sideris*. However, neither *E. viscosium* nor *E. limosus*  
526 contain an additional gene between APN2 and the MAT1-1-4 that is found in *E. sideris* (Teixeira et al.,  
527 2017). Furthermore, COX13 and APC5 are about 7,000bp downstream of the MAT locus in both species,  
528 but COX13 is on the opposite strand in *E. limosus* (**Figure 3**).

529

#### 530 Phenotyping of *E. viscosium* and *E. limosus*:

531 To further understand the morphology, growth capabilities, and stress responses of *E. viscosium* and *E.*  
532 *limosus*, we performed multiple phenotyping experiments. The intent of these experiments was to



533 provide a broader perspective on the potential adaptations that would support the ability of these fungi  
534 to successfully colonize biological soil crusts and other extreme niches.

#### 535 *Budding patterns*

536 Due to these species' similarities in colony morphology, observations of budding patterns in these new  
537 species became an essential task for differentiation. Microscopy was initially performed on cells grown  
538 from solid agar plates, which provided us with basic information that their cell morphology was  
539 different, with *E. viscosium* being very round and yeast-shaped and *E. limosus* having more elongated  
540 cells. But details regarding their budding patterns and cell polarity we're also needed. Using adapted  
541 protocols from (Mitchison-Field et al., 2019) we were able to perform a long-term microscopy time-  
542 lapse of the budding patterns of these species using the VALAP (1:1:1 Vasoline: Lanolin: Parafin)  
543 method to seal the edges of a coverslip while allowing gas exchange for cells to actively grow while  
544 observing for long periods of time (**Figure 4**). From this we were able to observe dramatic differences in  
545 the budding types of *E. viscosium* and *E. limosus*. *E. viscosium* buds with round cells in initially a distal  
546 fashion where the new bud forms 180° from the mother cell origination site, but also forms new buds at  
547 a ~90° angle from where the mother bud was formed in a proximal manner (**Figure 4; Video**). *E. limosus*  
548 on the other hand forms elongated cells in an exclusively distal manner, forming longer chains of cells  
549 instead of clusters (**Figure 4; Video**). These morphological differences in budding patterns influences  
550 the way these two species grow in a shaking flask. For example, *E. limosus* forms more elongated cells  
551 and buds distally which while does not create true hyphae, still creates larger clumps of cells which are  
552 not easily pipetted. However, *E. viscosium* since it forms rounder cells and buds with both distal and  
553 proximal patterns, does not form extensive clumps in a shaking flask and is more easily pipetted. *E.*  
554 *limosus* also forms more extensive biofilms at the liquid-air interface than *E. viscosium*, likely also due to  
555 the elongated cell morphology.

#### 556 *Growth of E. viscosium and E. limosus on 8 different medias:*

557 Growth of *E. viscosium* and *E. limosus* on a variety of different media was done to assess growth  
558 requirements and their impact on pigmentation (**Figure 5**). The media used are described in **Table 1**, and  
559 include MAG, MEA, MN+NAG, MNV, PDA, Spider, YPD, and V8. The addition of Vitamin mix (Table 1) to  
560 any medium, but specifically to MAG and MN, caused the growth of both isolates to become much  
561 shinier, blacker (vs. browner), and more yeast-like. Growth on MEA causes the formation of a rainbow  
562 sheen, which is not seen on any other medium. Spider medium and YPD caused the formation of a dark-  
563 colored halo around colonies of both species. However, the halo around colonies grown on YPD is much  
564 darker and extends further than on Spider medium, and *E. viscosium* showed a more extensive halo than  
565 *E. limosus*. The ability of both species to grow on V8 medium implies that they can use cellulosic  
566 material as a carbon source. Overall, colony growth and pigmentation were similar across of media  
567 types for both species (**Figure 5**).

#### 568 *Carbon and nitrogen utilization*

569 Carbon source utilization was determined using Biomerieux C32 carbon strips, which are typically used  
570 for identification of human pathogens (Tragiannidis et al., 2012). Following the protocols provided by  
571 the vendor, we were able to show that *E. viscosium* and *E. limosus* can utilize a wide range of carbon  
572 sources. Triplicates were performed on these strips to ensure results were uniform and representative.  
573 Overall, a variety of carbon sources supported robust growth of both species (e.g., D-glucose, L-sorbose,

574 D-galactose, N-acetyl glucosamine, D-sorbitol, D-xylose, glycerol, L-rhamnose, L-arabinose, D-cellobiose,  
575 and maltose), and there are only a few quantitative differences in utilization patterns (**Figure 6; Table 5**).  
576 Carbon sources that could not support growth include D-rafinoose, D-melibiose, methyl- $\alpha$ -  
577 glucopyranoside, and D-lactose. Both species were resistant to cycloheximide and were capable of  
578 producing a black color in the presence of esculin ferric citrate (**Figure 6**). Notably, for both *E. viscosium*  
579 and *E. limosus*, growth on some carbon sources, particularly sorbose and N-acetylglucosamine, lead to  
580 enhanced pigmentation (**Figure 6**).

581 We were particularly interested in patterns of nitrogen utilization for *E. viscosium* and *E. limosus* given  
582 their isolation from a nutrient deplete niche. Nine different nitrogen sources were tested: five amino  
583 acids (aspartate, glutamate, glycine, proline, serine), ammonium tartrate, sodium nitrate, urea, peptone  
584 (mixed short chain amino acids) as a positive control, and no nitrogen as a negative control. Both species  
585 are incapable of utilizing Aspartate and Glutamate as nitrogen sources (**Figure 7**). Preferred nitrogen  
586 sources for both species include ammonia and proline. However, they differ in that *E. viscosium* also  
587 prefers urea while *E. limosus* also prefers serine (**Figure 7**). Otherwise, patterns of nitrogen utilization  
588 appear generally similar across both species.

#### 589 *Optimal Growth Temperature and Range of growth temperatures*

590 *E. viscosium* and *E. limosus* were isolated from an environment that experiences wide seasonal and  
591 diurnal temperature changes. As such, we wanted to determine both the optimal growing temperature  
592 for these species, as well as the limits at which they are capable of survival. Both isolates were serial  
593 diluted and spotted onto MEA plates to determine the carrying capacity at different temperatures. Both  
594 *E. viscosium* and *E. limosus* were capable of growth at 4° C, 15° C, 23° C, and 27° C, but could not grow at  
595 37° C and 42° C (**Figure 8**). Optimal growth temperature of both *E. viscosium* and *E. limosus* was 23° C  
596 (**Figure 8**). Growth at 4° C was slow, but after a year the isolates both species formed obvious colonies  
597 and flooded the agar with melanin (**Figure 9**). Although neither species grew at 37° C, they retained  
598 viability as they were able to resume growth following return to 23° C after three days exposure to 37° C  
599 (**Figure 9**). In contrast, a similar experiment showed that incubation at 42° C is lethal.

#### 600 *UV and metal resistance*

601 Melanized fungi are recognized for their resistance to UV light, and the possibility of using ionizing  
602 radiation as an energy source (Dadachova et al., 2007). To assess the response of *E. viscosium* and *E.*  
603 *limosus* to UV radiation, they were each exposed to a dose (120 seconds of 10,000  $\mu$ J/cm<sup>2</sup>) that was  
604 lethal to *S. cerevisiae* and *E. dermatitidis* (data not shown). The same level of exposure did not kill either  
605 *E. viscosium* or *E. limosus* (**Figure 10**), but did significantly reduce the number of viable colonies.  
606 Strikingly, surviving colonies showed no evidence of induced mutagenesis based on the absence of  
607 altered morphologies or pigmentation (**Figure 10**).

608 Polyextremotolerant fungi have been previously noted as having increased metal resistances as a result  
609 of their melanized cell wall and other adaptations to harsh environments (Gadd & de Rome, 1988). To  
610 test if these two new *Exophiala* spp. possess increased metal resistances when compared to *E.*  
611 *dermatitidis* and *S. cerevisiae*, we impregnated Whatman filter discs with various metals of different  
612 concentrations. Diameters of zones of clearing revealed no evidence for enhanced metal resistance in *E.*  
613 *viscosium* or *E. limosus* (**Table 6**). On the other hand, both species appear to be moderately more  
614 sensitive to NiCl<sub>2</sub> and CdCl<sub>2</sub> (**Table 6**).

## 615 *Lipid Profiles*

616 Both *E. viscosium* and *E. limosus* appear to possess abundant lipid bodies (**Figure 2**). This observation  
617 along with the unique sticky morphology of both species led us to the idea that they might contain  
618 unique or copious amounts of lipids. We performed a lipid extraction followed by thin layer  
619 chromatography (TLC) to observe patterns of lipid accumulation in *E. viscosium* and *E. limosus* grown on  
620 media that contained fermentable or non-fermentable sugars, both with high nitrogen and low  
621 nitrogen. These iterations creating four unique medias would allow us to cover as much of a spread of  
622 lipid changes as possible. *S. cerevisiae* and *E. dermatitidis* were also similarly analyzed. Results from this  
623 lipid extraction showed that our two new species did not seem to produce any unique or novel amounts  
624 or types of lipids when compared to *S. cerevisiae* and *E. dermatitidis* (**Figure 11**).

## 625 Melanin production and regulation in *E. viscosium* and *E. limosus*

### 626 *Melanin biosynthesis gene annotation*

627 A defining feature of black yeasts such as *E. viscosium* and *E. limosus* is their pigmentation due to the  
628 accumulation of melanin (Bell & Wheeler, 1986). Given the presumed importance of melanin to a  
629 polyextremotolerant lifestyle, we are interested in understanding how melanin production is regulated  
630 in response to environmental inputs. A first step in this process is to determine the types of melanin that  
631 *E. viscosium* and *E. limosus* are capable of producing. To accomplish this, the sequenced genomes of *E.*  
632 *viscosium* and *E. limosus* were annotated using protein sequences for all three melanin biosynthetic  
633 pathways in *Aspergillus niger* (Teixeira et al., 2017). The list of *A. niger* genes and their homologs in both  
634 *E. viscosium* and *E. limosus* are summarized in **Table 7**. Manual annotation and reverse BLASTP of  
635 melanin biosynthesis pathway genes showed that both *E. viscosium* and *E. limosus* have the capability to  
636 produce all three forms of known fungal melanins: DOPA melanin (pheomelanin), DHN melanin  
637 (allomelanin), and L-tyrosine derived pyomelanin.

### 638 *Regulation of Melanin production using chemical blockers*

639 Because *E. viscosium* and *E. limosus* possess the capability to produce all three forms of fungal melanin,  
640 we asked whether they were all being produced simultaneously or if one was preferred for production  
641 and secretion. We used chemical blockers for both DOPA melanin and DHN melanin to determine the  
642 predominant type of melanin produced on MEA and YPD. Kojic acid blocks the production of DOPA  
643 melanin, whereas Phthalide inhibits the synthesis of DHN melanin; both are effective at doses of 1, 10,  
644 and 100 µg/mL (Pal et al., 2014).

645 First, we used 100 mM of phthalide and 100 mg/mL of kojic acid in a filter dick assay. Placing drug-  
646 impregnated filter discs on freshly spread lawns of cells either individually or with both drugs combined  
647 did not block melanin production even though the concentrations of the drugs were higher than that of  
648 previous studies (**Figure 12**). Then using the highest dosage of 100 µg/mL, we added Phthalide and Kojic  
649 acid individually and combined to agar-solidified MEA, and both spread a lawn of cells and spotted  
650 serially diluted cells onto the plates. Neither assay resulted in blockage of melanin production in *E.*  
651 *viscosium* or *E. limosus* (**Figure 12**). However, addition of 100 µg/mL of Phthalide alone did result in their  
652 apparent secretion of a dark substance into MEA (**Figure 13**). Overall, inhibition of DOPA melanin or  
653 DHN melanin production did not qualitatively reduce colony pigmentation, potentially suggesting that  
654 the tyrosine-derived melanin is still being produced.

## 655 *Melanin Secretion*

656 The appearance of a dark pigment surrounding colonies of *E. viscosium* and *E. limosus* under specific  
657 conditions raised the possibility that these yeasts are able to secrete melanin into their local  
658 environment. The presence of dark pigments in the supernatants of liquid cultures lent further support  
659 to this idea.

660 Initial studies were performed to determine which media triggered the release of melanin. Both *E.*  
661 *viscosium* and *E. limosus* were capable of releasing the most melanin and in the shortest growth time on  
662 YPD, with *E. viscosium* seemingly secreting more than *E. limosus* (**Figure 4**). Because YPD and MEA only  
663 differ in yeast vs. malt extract as well as the percentage of peptone (2% in YPD, 0.2% in MEA), we first  
664 determined if the peptone differences impacted melanin secretion. By switching the peptone amounts  
665 in YPD and MEA, we demonstrated that *E. viscosium* acquired the ability to secrete melanin on MEA if it  
666 was supplemented with 2% peptone. To extend this observation, we added progressively higher  
667 amounts of peptone to MEA media (i.e., 10 different concentrations of peptone ranging from 0.1% to  
668 5%). We observed that *E. viscosium* starts secreting melanin on MEA at a peptone amount of 2%, and *E.*  
669 *limosus* starts secreting melanin at about 4% peptone (**Figure 15**).

## 670 *Confirmation of active melanin secretion from living cells*

671 To confirm that the dark pigment in culture supernatants is indeed melanin, we performed a melanin  
672 extraction using previously described methods (Pal et al., 2014; Pralea et al., 2019). Although both  
673 enzymatic and chemical extraction of melanin was attempted, the chemical extraction process proved  
674 to be more efficient at recovering secreted melanin. (**Figure 16**). Therefore, all extractions going forward  
675 were performed using the chemical extraction method to ensure all melanin in the sample was  
676 precipitated out of the solution.

677 Growth of *E. viscosium*, *E. limosus*, and *E. dermatitidis* on YPD and MEA were observed daily for melanin  
678 secretion; 11 mL aliquots of their supernatant were removed daily and the melanin was extracted from  
679 each sample. As the experiment progressed, it was obvious that *E. viscosium* and *E. limosus* began  
680 secreting melanin on day 3 and secreted more in YPD than in MEA (**Figure 17**). *E. dermatitidis* on the  
681 other hand seemed to have a slower build-up of melanin, and melanin wasn't truly obvious in the  
682 medium until day 6 in MEA though it can be seen in MEA day 3 in **Figure 17**. Analysis of extracted  
683 melanin revealed that amounts increased over the course of the experiment, and that greater amounts  
684 of melanin are released in YPD for *E. viscosium* and *E. limosus* compared to MEA for *E. dermatitidis*  
685 (**Figure 16**). Interestingly, for both *E. viscosium* and *E. limosus*, their peak melanin secretion was on day 6  
686 and not on day 7 (**Figure 18**). There was actually less melanin on day 7 for both species, indicating that  
687 the melanin after day 6 was either degrading, or was being taken back up by the cells. This was only  
688 obvious with reading the OD results of the extracted melanin, as the supernatants themselves day 5 and  
689 on were all strikingly dark and hard to differentiate visually (**Figure 17**). Extracted melanin from all *E.*  
690 *viscosium* and *E. limosus* samples also displayed the typical results from a full spectrum read on melanin,  
691 *E. dermatitidis* did not show typical melanin spectrum results until day 6 in YPD but were typical every  
692 day in MEA. When graphed with OD to Wavelength the sample should have an exponentially decreasing  
693 OD as wavelength increases, and when the OD is changed to a log scale, the full spectrum read should  
694 be a linear regression with an R<sup>2</sup> value of 0.97 or higher (Pralea et al., 2019). All *E. viscosium* and *E.*  
695 *limosus* samples displayed these features, and therefore we can confirm that the dark nature of their  
696 supernatants is caused by actively secreted melanin.

697

## 698 Genetic analysis of Melanin Production

### 699 *Recovery of an albino mutant*

700 At this time, molecular tools for the manipulation of *E. viscosium* and *E. limosus* are not yet available.  
701 Therefore, we combined classical genetics with genome re-sequencing to initially investigate the  
702 regulation of melanin production. Following mutagenesis with the alkylating agent ethyl methyl  
703 sulfonate (EMS), mutants following into four distinct phenotypic classes were recovered: pink, crusty,  
704 brown, and melanin over-secretion (Data not shown). The most intriguing of these phenotypes was the  
705 pink phenotype found in a mutant of *E. limosus* we called EMS 2-11 (**Figure 19**). It has already been  
706 shown that blockage of melanin production in *E. dermatitidis* by mutations in *pk1* results in pink instead  
707 of albino colonies because they also produce carotenoids that are normally masked by melanin and by-  
708 products such as flavolin (Geis & Szaniszló, 1984; Geis et al., 1984). Genome re-sequencing of high  
709 molecular weight DNA from mutant EMS 2-11 and comparison to the reference *E. limosus* genome  
710 revealed a deleterious SNP causing a nonsense mutation in *pk1*. This mutation was on position  
711 2,346,590 in scaffold 3, located in the *pk1* gene, which caused an C -> T mutation on the first position of  
712 the codon such that it became a stop codon. Interestingly, *pk1* only functions in one of the three  
713 melanin biosynthetic pathways found in *E. limosus*. Only two of the other random mutations found in  
714 EMS 2-11 were missense or nonsense mutations. One is a mutation in a transcriptional repressor EZH1,  
715 and another is in alcohol dehydrogenase GroES-like/Polyketide synthase enolreductase. Although either  
716 of these mutations could contribute to the pink phenotype, it is more likely that a nonsense mutation in  
717 *pk1* is solely responsible for the loss of melanin production despite the apparent presence of the other  
718 biosynthetic pathways.

### 719 *Recovery of melanin production in albino mutant*

720 Pks1 is a polyketide synthase gene that is essential for the first step in the DHN-melanin/Allomelanin  
721 production pathway. To test if “activation” of an alternative melanin production pathway could restore  
722 melanin production to the EMS 2-11 mutant, we substituted 1 mM of L-DOPA into the medium. As L-  
723 DOPA is a required external metabolite for melanin production in other fungi such as *Cryptococcus*  
724 *neoformans*, thus presumed that it would be taken up by our EMS 2-11 mutant and activate the DOPA  
725 melanin/pheomelanin biosynthesis pathway (Dadachova et al., 2007). However, substitution of 1 mM L-  
726 DOPA into either MEA or YPD was not enough to cause melanin production in the EMS 2-11 *pk1* mutant  
727 (**Figure 19**). These plates were grown in the dark for 10 days, as L-DOPA will auto polymerize into a  
728 melanin precursor in the presence of light, and still no melanin production was observed. Hydroxyurea is  
729 another compound that in other *Exophiala* species induces melanin production, however addition of 20  
730 mM of Hydroxyurea also did not activate melanin production in our EMS 2-11 albino mutant (**Figure 19**)  
731 (Schultzhaus et al., 2020). Finally, we substituted in 1 mM of 1,8-DHN into their media which is the  
732 immediate precursor to DHN melanin, in hopes of recovering melanin production. This resulted in  
733 recovery of melanized colonies, while on MEA they do not form extensive growth, their cells are still  
734 dark, and on YPD active dark colony growth is observed (**Figure 19**).

735

736

## Discussion



737 A major limitation to our understanding of the role(s) played by BSCs in semi-arid ecosystems is our lack  
738 of insight into the components of these “biofilms” and the nature of their functional interactions. As  
739 photoautotrophs, the roles of cyanobacteria and algae in BSCs are clear (REF), but the importance of  
740 other residents such as fungi and bacteria is less so. Here, we identify two novel species of black yeasts  
741 from BSCs; *E. viscosium* and *E. limosus*. In addition to presenting the complete annotated genome  
742 sequence for each species, we also provide a relatively detailed profile of their ability to utilize diverse  
743 carbon and nitrogen sources, as well as their response to different forms of stress. Most importantly, we  
744 demonstrate that *E. viscosium* and *E. limosus* are capable of producing multiple types of melanin,  
745 including one that is secreted at high levels. Our results suggest that by making melanin available as a  
746 public good, black yeasts provide a critical service to the broader BSC community.

#### 747 *Description and genome features of E. viscosium and E. limosus*

748 *Exophiala viscosium* and *E. limosus* are two novel fungi from the family Herpotrichiellaceae that we  
749 isolated from a lichen-dominated BSC. Since their initial isolation, their distinguishing features that lead  
750 us to investigate further were their “goopy” and “slimy” morphology, their impressively dark cells, their  
751 secretion of dark material into their growth medium, and their uniquely yeast-like morphology  
752 compared to more filamentous growth of other isolates. These unique aspects made them some of the  
753 easiest isolates to work with, accelerating their experiments faster than other isolated species (25 in  
754 total). However, until they were whole genome sequenced it was difficult to gain a deep understanding  
755 of what they were capable of physiologically and ecologically. With their genomes and many  
756 phenotyping experiments, we gained a basic idea of what these species are capable of in an ecological  
757 and fungal manner.

758 One interesting feature that the genome comparisons of *E. sideris* to *E. viscosium* and *E. limosus*  
759 revealed was that *E. sideris* contains a lower predicted gene content than the other two isolates. This  
760 could be a factor of their differences in their ecology and lifestyles. *E. sideris* was isolated from a highly  
761 toxic environment containing arsenate, hydrocarbons, and other toxins meaning this species had to  
762 specialize in withstanding these toxins rather than generalizing its survival genetic toolbox  
763 (Seyedmousavi et al., 2011). Additionally, the mating loci of these species are very similar containing  
764 only one mating type, MAT-alpha (MAT1-1), and the same gene organization within the loci albeit with  
765 different transcription directionality for COX13 and APC5 amongst the species. One mating type per  
766 genome is typical of many *Exophiala* species as most are heterothallic and maintain their anamorphic  
767 nomenclature of *Exophiala* (Teixeira et al., 2017; Untereiner & Naveau, 1999).

#### 768 *Phenotypic characterization of E. viscosium and E. limosus*

769 These species have quite a flexible metabolism for carbon and nitrogen utilization. *E. viscosium* and *E.*  
770 *limosus* are capable of using 24 and 26 out of the 30 carbon sources respectively. Utilization of these  
771 carbon sources tested either completely or variably, including mannitol, ribitol, and glucose which are  
772 considered the main carbon sources exchanged within lichens (Richardson et al., 1967; Yoshino et al.,  
773 2020). They were also able to use all nitrogen sources provided, except both glutamate and aspartate  
774 were unfavorably used as opposed to what is seen at least in *S. cerevisiae*, where glutamate is a more  
775 favorable nitrogen source used for multiple core metabolism and amino acid production processes  
776 (Ljungdahl & Daignan-Fornier, 2012). Since peptone is their second most favorable nitrogen source, it is  
777 assumed that these species can import peptides and degrade them for sources of ammonium. Their  
778 most favorable nitrogen source is ammonium/ammonia though, which in their ecological environment

779 would likely be produced by cyanobacteria and other nitrogen-fixing bacteria (Belnap, 2002). However,  
780 they can also use nitrate and urea as nitrogen sources, again pointing to their metabolic flexibility in  
781 their nutrient depleted ecosystem.

782 Biological soil crusts in addition to their nutrient replete conditions, are also highly stressful  
783 environments abiotically. These isolates came from a site that can experience extremes in temperature,  
784 UV, and soil wetness/osmotic pressure. We determined that their optimal growth range is from 15° C to  
785 27° C, however they are capable of slow growth at 4° C and while they do not grow at 37° C, they also do  
786 not die at these temperatures after 72 consecutive hours of exposure. Their ability to continue growth  
787 at 4° C is quite a feat though, and emphasizes their need to grow in unfavorable conditions if nutrients  
788 and hydration are optimal. Wide range in growth temperatures, especially into the lower ranges, allows  
789 for a longer time period of active growth in the arctic tundra as compared to growth in a hot desert  
790 (Belnap, 2002).

791 As for resistance to UV light, both species were both highly capable of surviving the high exposure used  
792 and were uniquely resistant to typical UV mutagenesis. Whether these species rely on their melanin for  
793 resistance to DNA damage from UV, or because of their habitat, they evolved to have increased DNA  
794 damage repair mechanisms will be a topic to investigate in the future.

795 Finally, two features we expected to find in our new species but we did not necessarily observe were  
796 higher metal resistance and increased lipid accumulation. Melanin is known to enhance resistances to  
797 metals (Bell & Wheeler, 1986; Gadd, 1994; Gorbushina, 2007; Purvis et al., 2004), and so it was assumed  
798 that these new species would have increased metal tolerance when compared to non-melanized fungi.  
799 However, of the metals tested, only AgNO<sub>3</sub> and CuCl<sub>2</sub> showed a decreased zone of clearing in *E.*  
800 *viscosium* and *E. limosus*, compared to *S. cerevisiae* and *E. dermatitidis*. This result is understandable as  
801 melanin has a higher affinity for copper due to the phenolic compounds it contains (Gadd & de Rome,  
802 1988). As for lipid accumulation, we initially observed that both fungi produced lipid bodies confirmed  
803 with Nile red staining. However, after performing our experiment comparing *S. cerevisiae*, *E.*  
804 *dermatitidis*, *E. viscosium*, and *E. limosus* lipid production we did not observe a difference in lipid  
805 amounts per cell count.

#### 806 *Secretion of melanin by E. viscosium and E. limosus*

807 Melanin is considered an expensive secondary metabolite to produce by organisms, since it is made up  
808 of conglomerates of polyphenols and as such contains many carbons. Therefore, it would be assumed  
809 that an organism would not want to create melanin just to export it out of the cell unless there was a  
810 beneficial reason behind it. Additionally, there are not many fungi that are known to secrete melanin  
811 and none in the genus *Exophiala*, so the possibility of novel species that secrete melanin into their  
812 surroundings was intriguing. Both novel fungi have the genetic tools to produce all three types of fungal  
813 melanin: allomelanin, pyomelanin, and eumelanin; but it is still unknown how these melanin  
814 biosynthetic pathways are regulated, and which are being actively produced.

815 In our attempts to understand the regulation of melanin production by *E. viscosium* and *E. limosus* we  
816 tried blocking individual pathways using known chemical blockers of DHN and DOPA melanin, phthalide  
817 and kojic acid respectively. Neither blockers, nor their combination at the highest amounts used were  
818 able to block the production of melanin in either species. If these species have the capability to produce  
819 all three melanins, then it is possible that they are producing more than one at the same time. This

820 could be the case here, since the combination of both kojic acid and phthalide still resulted in melanized  
821 cells which would indicate that pyomelanin was the cause of melanization.

822 Linked regulation of multiple forms of melanin was observed with our EMS mutant where the *pk1* gene  
823 contained a nonsense mutation. Although *pk1* is the first enzyme involved in only the production of  
824 DHN-derived allomelanin, the cells that resulted from this mutation were all albino. Theoretically, these  
825 cells should have still been capable of producing the two other melanins as their pathways were not  
826 disrupted by any mutations, but this was not the case. Therefore, it is possible that either these fungi  
827 are only producing DHN-derived allomelanin and disruption of the *pk1* gene causes all melanin  
828 production to shut down, or that *pk1* (or downstream creation of allomelanin) is essential for the  
829 regulation of other melanin productions.

830 Additionally, we wanted to confirm that these fungi were actively secreting melanin while alive. In our  
831 experiments melanin began to accumulate starting as early as day 2, therefore we could confirm that it  
832 is live cells that are secreting melanin and not dead lysed cells. However, we observed a decrease in  
833 melanin concentrations after day 6 in both YPD and MEA in *E. viscosium* and *E. limosus* which still poses  
834 an intriguing potential for melanin reabsorption or degradation by these species.

835 For *E. viscosium* and *E. limosus* the medium that stimulates the most melanin secretion is YPD which has  
836 10x more nitrogen (2% vs. 0.2%) than the alternative medium we use, MEA, which neither fungi secrete  
837 melanin into when plated on solid media. This led us to believe that nitrogen amount could potentially  
838 have an effect on the production of secreted melanin, which we did observe as we increased peptone  
839 amounts in the medium. Although *E. viscosium* required less peptone than *E. limosus* to be secreting  
840 melanin. Interestingly, the only fungal melanin that has nitrogen in its precursor structure is the DOPA  
841 derived pheomelanin. This was one of two melanins that would have been allowed to be produced in  
842 the presence of phthalide, which we observed also induced the secretion of melanin in these fungi. This  
843 provides support that the secreted melanin is either pheomelanin, as it requires more nitrogen in order  
844 to be produced, or that the production of pheomelanin (DOPA) and the water soluble pyomelanin  
845 (Turick et al., 2010) are linked.

#### 846 *Insights into polyextremotolerant fungi's niche within the biological soil crust consortium*

847 Fungi living amongst lichens, within an even larger more diverse consortium is an odd ecological niche to  
848 hold. These fungi are likely not associated directly with the lichens themselves, yet are surrounded by  
849 algae, cyanobacteria, and other bacteria in the same way that a lichenized-fungus is surrounded by a  
850 similar community of microbes. So why not lichenize? Why stay as a free-living fungus? Members of the  
851 genus *Exophiala* (Family Herpotrichiellaceae) are phylogenetically related to the lichen-forming  
852 Verrucariales, and reside between Lecanoromycetes and Lichinomycetes (James et al., 2006). Lifestyle  
853 changes within Eurotiomycetes contributed to the polyphyletic nature of lichenization within the  
854 Ascomycetes, but since surrounding taxa are lichenized it is more likely that these species lost  
855 lichenization than three distinct lichenization events within closely related species (Lutzoni et al., 2001).  
856 Possibly, because these new *Exophiala* species have lichenized ancestors, they lost their “true  
857 lichenization” capabilities, but maintained the genetic tools to interact with algae, cyanobacteria, and  
858 other bacteria to form lichen-like symbioses. But these seemingly free-living yeasts could also be  
859 lichenicolous fungi, and only inhabiting the lichens formed in biological soil crusts. As these are two newly  
860 identified species, it will require more extensive molecular approaches to determine how ubiquitous  
861 these species are within biological soil crusts around the world or even within lichens.

862 Links between environmental nitrogen amounts and melanin secretion could have strong implications  
863 for interactions between these fungi and their nitrogen fixing community members. Increase in nitrogen  
864 caused increase in melanin secretion, increase in nitrogen in a biological soil crust would have to come  
865 from nitrogen-fixers such as cyanobacteria, other bacteria, and archaea in the community. Therefore, as  
866 the n-fixers provide the fungal cells with ammonia, their secreted melanin increases and helps assist the  
867 community in abiotic protection. This could be a factor of the window of opportunity for the biological  
868 soil crust community to actively respire and grow requires exact temperatures and exact hydration, but  
869 not exact UV exposure. In the event that optimal growth conditions occur for this community to grow,  
870 UV exposure will always be the constant drawback. One way of ensuring the community (and therefore  
871 the individual) survives in this circumstance, is blocking UV overexposure by secretion of melanin into  
872 the biofilm. Alternatively, or simultaneously, this secreted melanin could be an external source of  
873 carbon used by the fungi and possibly others when the environment does not allow for photosynthesis.  
874 As stated, melanin is an expensive bioproduct carbon-wise, and secretion of such an expensive product  
875 seems wasteful. However, if these fungi are either capable of shielding the greater biological soil crust  
876 community and/or creating an external carbon storage for less-than-ideal conditions, this could be an  
877 optimal usage of secreted melanin.

878 Through the use of genome annotations, extensive phenotyping, and melanin regulation tests we have  
879 derived certain important features that we believe are vital to the survival of these species in their  
880 ecosystem. We believe that these two fungi and fungi related to them have an important niche for the  
881 biological soil crust community. Their ability to produce melanin whether it be in their cell wall directly  
882 or secreted, allows for an increase in the overall protection of the rest of the community via this melanin  
883 good. Melanin is likely a vital commodity for the biological soil crust community to thrive amongst the  
884 abiotic extremes their ecosystem provides, and having a consortium of polyextremotolerant fungi there  
885 to produce it is essential for the survival of the community. Additional questions that still need to be  
886 answered are: how is the production of different types of melanin regulated in response to  
887 environmental and chemical inputs?; what role does secreted melanin play in the BSC community – is it  
888 a shared public good?; and can the genome sequences be leveraged to further understand how these  
889 yeasts interact with other members of the BSC community?

890

891 Citations:

- 892 Ametrano, C. G., Selbmann, L., & Muggia, L. (2017). A standardized approach for co-culturing  
893 Dothidealean rock-inhabiting fungi and lichen photobionts in vitro. *Symbiosis*, 73(1), 35-44.
- 894 Armaleo, D., Müller, O., Lutzoni, F., Andrésón, Ó. S., Blanc, G., Bode, H. B., . . . Xavier, B. B. (2019). The  
895 lichen symbiosis re-viewed through the genomes of *Cladonia grayi* and its algal partner  
896 *Asterochloris glomerata*. *BMC Genomics*, 20(1), 605. [https://doi.org/10.1186/s12864-019-5629-](https://doi.org/10.1186/s12864-019-5629-x)  
897 [x](https://doi.org/10.1186/s12864-019-5629-x)
- 898 Bates, S. T., Garcia-Pichel, F., & Nash III, T. (2010). Fungal components of biological soil crusts: insights  
899 from culture-dependent and culture-independent studies. *Bibliotheca Lichenologica*, 105, 197-  
900 210.
- 901 Bates, S. T., Reddy, G. S., & Garcia-Pichel, F. (2006). *Exophiala crusticola* anam. nov.(affinity  
902 Herpotrichiellaceae), a novel black yeast from biological soil crusts in the Western United States.  
903 *International journal of systematic and evolutionary microbiology*, 56(11), 2697-2702.

- 904 Bell, A. A., & Wheeler, M. H. (1986). Biosynthesis and functions of fungal melanins. *Annual review of*  
905 *phytopathology*, 24(1), 411-451.
- 906 Belnap, J. (2002). Nitrogen fixation in biological soil crusts from southeast Utah, USA. *Biology and*  
907 *fertility of soils*, 35(2), 128-135.
- 908 Belnap, J. (2003). The world at your feet: desert biological soil crusts. *Frontiers in Ecology and the*  
909 *Environment*, 1(4), 181-189.
- 910 Belnap, J., Büdel, B., & Lange, O. L. (2001). Biological soil crusts: characteristics and distribution. In  
911 *Biological soil crusts: structure, function, and management* (pp. 3-30). Springer.
- 912 Belnap, J., & Eldridge, D. (2001). Disturbance and recovery of biological soil crusts. In *Biological soil*  
913 *crusts: structure, function, and management* (pp. 363-383). Springer.
- 914 Bowker, M. A., Reed, S., Belnap, J., & Phillips, S. (2002). Temporal variation in community composition,  
915 pigmentation, and Fv/Fm of desert cyanobacterial soil crusts. *Microbial Ecology*, 13-25.
- 916 Bowker, M. A., Soliveres, S., & Maestre, F. T. (2010). Competition increases with abiotic stress and  
917 regulates the diversity of biological soil crusts. *Journal of Ecology*, 98(3), 551-560.
- 918 Cao, W., Zhou, X., McCallum, N. C., Hu, Z., Ni, Q. Z., Kapoor, U., . . . Mantanona, A. J. (2021). Unraveling  
919 the structure and function of melanin through synthesis. *Journal of the American Chemical*  
920 *Society*, 143(7), 2622-2637.
- 921 Cordero, R. J., & Casadevall, A. (2017). Functions of fungal melanin beyond virulence. *Fungal Biology*  
922 *Reviews*, 31(2), 99-112.
- 923 Cubero, O. F., Crespo, A., Fatehi, J., & Bridge, P. D. (1999). DNA extraction and PCR amplification method  
924 suitable for fresh, herbarium-stored, lichenized, and other fungi. *Plant Systematics and*  
925 *Evolution*, 216(3), 243-249.
- 926 D'Orazio, J., Jarrett, S., Amaro-Ortiz, A., & Scott, T. (2013). UV radiation and the skin. *International*  
927 *journal of molecular sciences*, 14(6), 12222-12248.
- 928 Dadachova, E., Bryan, R. A., Huang, X., Moadel, T., Schweitzer, A. D., Aisen, P., . . . Casadevall, A. (2007).  
929 Ionizing radiation changes the electronic properties of melanin and enhances the growth of  
930 melanized fungi. *PLoS one*, 2(5), e457.
- 931 De Hoog, G., Vicente, V., Caligiorne, R., Kantarcioglu, S., Tintelnot, K., Gerrits van den Ende, A., & Haase,  
932 G. (2003). Species diversity and polymorphism in the Exophiala spinifera clade containing  
933 opportunistic black yeast-like fungi. *Journal of Clinical Microbiology*, 41(10), 4767-4778.
- 934 Donlan, R. M., & Costerton, J. W. (2002). Biofilms: survival mechanisms of clinically relevant  
935 microorganisms. *Clinical microbiology reviews*, 15(2), 167-193.
- 936 Frases, S., Salazar, A., Dadachova, E., & Casadevall, A. (2007). Cryptococcus neoformans can utilize the  
937 bacterial melanin precursor homogentisic acid for fungal melanogenesis. *Applied and*  
938 *environmental microbiology*, 73(2), 615-621.
- 939 Gadd, G. M. (1994). Interactions of fungi with toxic metals. *The Genus Aspergillus*, 361-374.
- 940 Gadd, G. M., & de Rome, L. (1988). Biosorption of copper by fungal melanin. *Applied microbiology and*  
941 *biotechnology*, 29(6), 610-617.
- 942 Geis, P. A., & Szanislo, P. J. (1984). Carotenoid pigments of the dematiaceous fungus Wangiella  
943 dermatitidis. *Mycologia*, 76(2), 268-273.
- 944 Geis, P. A., Wheeler, M. H., & Szanislo, P. J. (1984). Pentaketide metabolites of melanin synthesis in the  
945 dematiaceous fungus Wangiella dermatitidis. *Archives of microbiology*, 137(4), 324-328.
- 946 Gessler, N., Egorova, A., & Belozerskaya, T. (2014). Melanin pigments of fungi under extreme  
947 environmental conditions. *Applied Biochemistry and Microbiology*, 50(2), 105-113.
- 948 Gnerre, S., MacCallum, I., Przybylski, D., Ribeiro, F. J., Burton, J. N., Walker, B. J., . . . Jaffe, D. B. (2011).  
949 High-quality draft assemblies of mammalian genomes from massively parallel sequence data.  
950 *Proceedings of the National Academy of Sciences*, 108(4), 1513-1518.
- 951 <https://doi.org/10.1073/pnas.1017351108>



- 952 Gorbushina, A. A. (2007). Life on the rocks. *Environmental microbiology*, 9(7), 1613-1631.
- 953 Gostinčar, C., Grube, M., De Hoog, S., Zalar, P., & Gunde-Cimerman, N. (2009). Extremotolerance in  
954 fungi: evolution on the edge. *FEMS microbiology ecology*, 71(1), 2-11.
- 955 Gostinčar, C., Grube, M., & Gunde-Cimerman, N. (2011). Evolution of fungal pathogens in domestic  
956 environments? *Fungal biology*, 115(10), 1008-1018.
- 957 Gostinčar, C., Muggia, L., & Grube, M. (2012). Polyextremotolerant black fungi: oligotrophism, adaptive  
958 potential, and a link to lichen symbioses. *Frontiers in Microbiology*, 3, 390.
- 959 Grabherr, M. G., Haas, B. J., Yassour, M., Levin, J. Z., Thompson, D. A., Amit, I., . . . Zeng, Q. (2011). Full-  
960 length transcriptome assembly from RNA-Seq data without a reference genome. *Nature*  
961 *biotechnology*, 29(7), 644-652.
- 962 Grigoriev, I. V., Nikitin, R., Haridas, S., Kuo, A., Ohm, R., Otilar, R., . . . Shabalov, I. (2014). MycoCosm  
963 portal: gearing up for 1000 fungal genomes. *Nucleic Acids Research*, 42(D1), D699-D704.  
964 <https://doi.org/10.1093/nar/gkt1183>
- 965 Grube, M., Cernava, T., Soh, J., Fuchs, S., Aschenbrenner, I., Lassek, C., . . . Sensen, C. W. (2015).  
966 Exploring functional contexts of symbiotic sustain within lichen-associated bacteria by  
967 comparative omics. *The ISME journal*, 9(2), 412-424.
- 968 Hayakawa, Y., Ishikawa, E., Shoji, J. y., Nakano, H., & Kitamoto, K. (2011). Septum-directed secretion in  
969 the filamentous fungus *Aspergillus oryzae*. *Molecular microbiology*, 81(1), 40-55.
- 970 Hom, E. F., & Murray, A. W. (2014). Niche engineering demonstrates a latent capacity for fungal-algal  
971 mutualism. *Science*, 345(6192), 94-98.
- 972 James, T. Y., Kauff, F., Schoch, C. L., Matheny, P. B., Hofstetter, V., Cox, C. J., . . . Miadlikowska, J. (2006).  
973 Reconstructing the early evolution of Fungi using a six-gene phylogeny. *Nature*, 443(7113), 818-  
974 822.
- 975 Kirilovsky, D. (2010). The photoactive orange carotenoid protein and photoprotection in cyanobacteria.  
976 *Recent advances in phototrophic prokaryotes*, 139-159.
- 977 Lan, S., Wu, L., Zhang, D., & Hu, C. (2012). Successional stages of biological soil crusts and their  
978 microstructure variability in Shapotou region (China). *Environmental Earth Sciences*, 65(1), 77-  
979 88.
- 980 Lawrence, C. W. (1982). Mutagenesis in *Saccharomyces cerevisiae*. *Advances in genetics*, 21, 173-254.
- 981 Ljungdahl, P. O., & Daignan-Fornier, B. (2012). Regulation of amino acid, nucleotide, and phosphate  
982 metabolism in *Saccharomyces cerevisiae*. *Genetics*, 190(3), 885-929.
- 983 Lutzoni, F., Pagel, M., & Reeb, V. (2001). Major fungal lineages are derived from lichen symbiotic  
984 ancestors. *Nature*, 411(6840), 937-940.
- 985 Maier, S., Muggia, L., Kuske, C. R., & Grube, M. (2016). Bacteria and non-lichenized fungi within  
986 biological soil crusts. In *Biological Soil Crusts: An Organizing Principle in Drylands* (pp. 81-100).  
987 Springer.
- 988 Mitchison-Field, L. M. Y., Vargas-Muñiz, J. M., Stormo, B. M., Vogt, E. J. D., Van Dierdonck, S., Pelletier, J.  
989 F., . . . Gladfelter, A. S. (2019). Unconventional Cell Division Cycles from Marine-Derived Yeasts.  
990 *Current Biology*, 29(20), 3439-3456.e3435. <https://doi.org/10.1016/j.cub.2019.08.050>
- 991 Pal, A. K., Gajjar, D. U., & Vasavada, A. R. (2014). DOPA and DHN pathway orchestrate melanin synthesis  
992 in *Aspergillus* species. *Medical mycology*, 52(1), 10-18.
- 993 Perez-Cuesta, U., Aparicio-Fernandez, L., Gुरुceaga, X., Martin-Souto, L., Abad-Diaz-de-Cerio, A.,  
994 Antoran, A., . . . Rementeria, A. (2020). Melanin and pyomelanin in *Aspergillus fumigatus*: from  
995 its genetics to host interaction. *International Microbiology*, 23(1), 55-63.
- 996 Pralea, I.-E., Moldovan, R.-C., Petrache, A.-M., Ilieș, M., Hegheș, S.-C., Ielciu, I., . . . Radu, M. (2019). From  
997 extraction to advanced analytical methods: The challenges of melanin analysis. *International*  
998 *journal of molecular sciences*, 20(16), 3943.

- 999 Purvis, O. W., Bailey, E. H., McLean, J., Kasama, T., & Williamson, B. J. (2004). Uranium biosorption by  
1000 the lichen *Trapelia involuta* at a uranium mine. *Geomicrobiology Journal*, 21(3), 159-167.
- 1001 Pócs, T. (2009). Cyanobacterial crust types, as strategies for survival in extreme habitats. *Acta Botanica*  
1002 *Hungarica*, 51(1-2), 147-178.
- 1003 Płonka, P., & Grabacka, M. (2006). Melanin synthesis in microorganisms: biotechnological and medical  
1004 aspects. *Acta Biochimica Polonica*, 53(3).
- 1005 Rajeev, L., Da Rocha, U. N., Klitgord, N., Luning, E. G., Fortney, J., Axen, S. D., . . . Kerfeld, C. A. (2013).  
1006 Dynamic cyanobacterial response to hydration and dehydration in a desert biological soil crust.  
1007 *The ISME journal*, 7(11), 2178-2191.
- 1008 Rastogi, R. P., Kumar, A., Tyagi, M. B., & Sinha, R. P. (2010). Molecular mechanisms of ultraviolet  
1009 radiation-induced DNA damage and repair. *Journal of nucleic acids*, 2010.
- 1010 Richardson, D., Smith, D., & Lewis, D. (1967). Carbohydrate movement between the symbionts of  
1011 lichens. *Nature*, 214(5091), 879-882.
- 1012 Rosas, Á. L., Nosanchuk, J. D., Gómez, B. L., Edens, W. A., Henson, J. M., & Casadevall, A. (2000). Isolation  
1013 and serological analyses of fungal melanins. *Journal of immunological methods*, 244(1-2), 69-80.
- 1014 Schroeder, W. L., Harris, S. D., & Saha, R. (2020). Computation-driven analysis of model polyextremo-  
1015 tolerant fungus *Exophiala dermatitidis*: defensive pigment metabolic costs and human  
1016 applications. *IScience*, 23(4), 100980.
- 1017 Schultzhau, Z., Romsdahl, J., Chen, A., Tschirhart, T., Kim, S., Leary, D., & Wang, Z. (2020). The response  
1018 of the melanized yeast *Exophiala dermatitidis* to gamma radiation exposure. *Environmental*  
1019 *microbiology*, 22(4), 1310-1326.
- 1020 Seyedmousavi, S., Badali, H., Chlebicki, A., Zhao, J., Prenafeta-Boldu, F. X., & De Hoog, G. S. (2011).  
1021 *Exophiala sideris*, a novel black yeast isolated from environments polluted with toxic alkyl  
1022 benzenes and arsenic. *Fungal biology*, 115(10), 1030-1037.
- 1023 Teixeira, M. d. M., Moreno, L. F., Stielow, B., Muszewska, A., Hainaut, M., Gonzaga, L., . . . Souza, R.  
1024 (2017). Exploring the genomic diversity of black yeasts and relatives (Chaetothyriales,  
1025 Ascomycota). *Studies in mycology*, 86, 1-28.
- 1026 Tragiannidis, A., Fegeler, W., Rellensmann, G., Debus, V., Müller, V., Hoernig-Franz, I., . . . Groll, A.  
1027 (2012). Candidaemia in a European Paediatric University Hospital: a 10-year observational study.  
1028 *Clinical Microbiology and Infection*, 18(2), E27-E30.
- 1029 Turick, C. E., Knox, A. S., Becnel, J. M., Ekechukwu, A. A., & Milliken, C. E. (2010). Properties and function  
1030 of pyomelanin. *Biopolymers*, 449, 72.
- 1031 Untereiner, W. A., & Naveau, F. A. (1999). Molecular systematics of the Herpotrichiellaceae with an  
1032 assessment of the phylogenetic positions of *Exophiala dermatitidis* and *Phialophora americana*.  
1033 *Mycologia*, 91(1), 67-83.
- 1034 White, T. J., Bruns, T., Lee, S., & Taylor, J. (1990). 38 - AMPLIFICATION AND DIRECT SEQUENCING OF  
1035 FUNGAL RIBOSOMAL RNA GENES FOR PHYLOGENETICS. In M. A. Innis, D. H. Gelfand, J. J.  
1036 Sninsky, & T. J. White (Eds.), *PCR Protocols* (pp. 315-322). Academic Press.  
1037 <https://doi.org/https://doi.org/10.1016/B978-0-12-372180-8.50042-1>
- 1038 Winston, F. (2008). EMS and UV mutagenesis in yeast. *Current protocols in molecular biology*, 82(1),  
1039 13.13 B. 11-13.13 B. 15.
- 1040 Yoshino, K., Yamamoto, K., Masumoto, H., Degawa, Y., Yoshikawa, H., Harada, H., & Sakamoto, K. (2020).  
1041 Polyol-assimilation capacities of lichen-inhabiting fungi. *The Lichenologist*, 52(1), 49-59.
- 1042 Zanne, A. E., Abarenkov, K., Afkhami, M. E., Aguilar-Trigueros, C. A., Bates, S., Bhatnagar, J. M., . . .  
1043 Crowther, T. W. (2020). Fungal functional ecology: bringing a trait-based approach to plant-  
1044 associated fungi. *Biological Reviews*, 95(2), 409-433.
- 1045 Zerbino, D. R., & Birney, E. (2008). Velvet: algorithms for de novo short read assembly using de Bruijn  
1046 graphs. *Genome research*, 18(5), 821-829.

1047 Zupančič, J., Novak Babič, M., Zalar, P., & Gunde-Cimerman, N. (2016). The black yeast *Exophiala*  
1048 dermatitidis and other selected opportunistic human fungal pathogens spread from dishwashers  
1049 to kitchens. *PLoS One*, *11*(2), e0148166.

1050

1051

1052

1053 Acknowledgements

1054 The work conducted by the U.S. Department of Energy Joint Genome Institute, a DOE Office of Science  
1055 User Facility, is supported by the Office of Science of the U.S. Department of Energy under Contract No.  
1056 DE-AC02-05CH11231.

1057

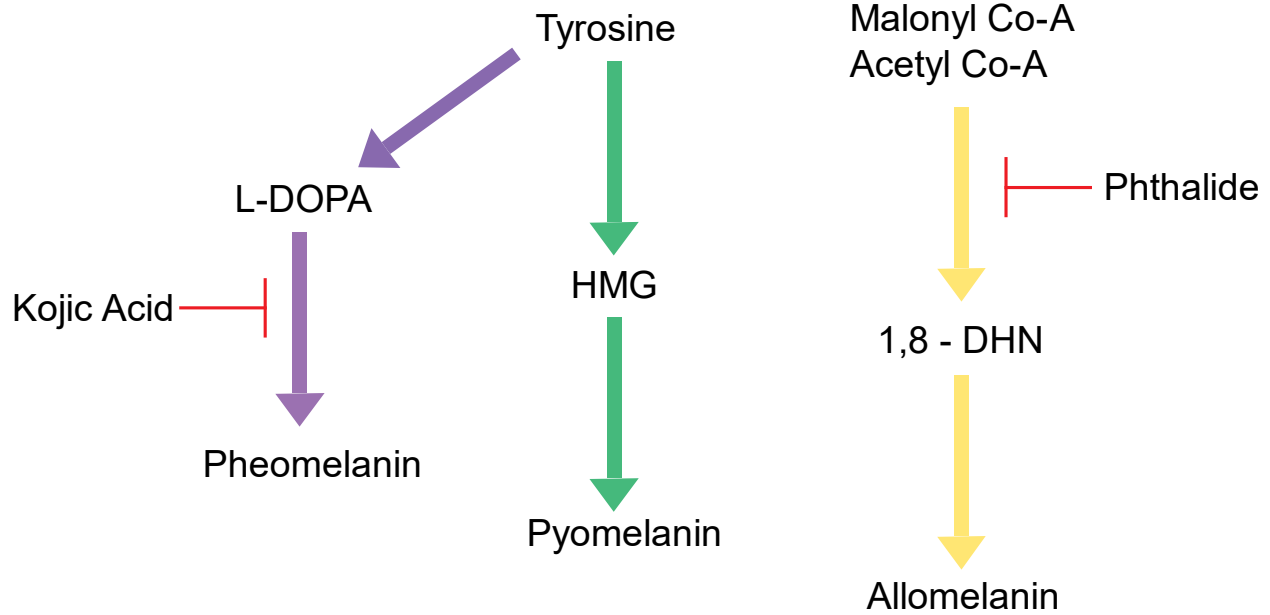

*Figure 1:* Visual summary of fungal melanin production and the chemicals that block each melanin pathway. Pheomelanin and Pyomelanin both use tyrosine as their starting reagent but have different biosynthesis pathways unrelated to each other. Pheomelanin uses L-DOPA as a precursor to the final melanin and pyomelanin uses HMG as a precursor. Allomelanin's starting components are malonyl co-A and acetyl co-A, and its immediate precursor is 1,8-DHN. Kojic acid is a chemical blocker that blocks production of pheomelanin, and phthalide blocks production of allomelanin.

*Table 1:* Medias used and their compositions

| Media Name                     | Acronym | Composition (L <sup>-1</sup> )                                                                                     |
|--------------------------------|---------|--------------------------------------------------------------------------------------------------------------------|
| Malt Extract Agar Glucose      | MAG     | 20 g Dextrose<br>20 g Malt Extract<br>2 g Peptone<br>1 mL Hutner's Trace Elements<br>1 mL Vitamin Mix<br>15 g Agar |
| Malt Extract Agar              | MEA     | 20 g Dextrose<br>20 g Malt Extract<br>2 g Peptone<br>15 g Agar                                                     |
| Minimal                        | MN      | 10 g Dextrose<br>50 mL 20x Nitrate salts<br>1 mL Hutner's Trace Elements                                           |
| Minimal + Vitamins             | MNV     | 10 g Dextrose<br>50 mL 20x Nitrate salts<br>1 mL Hutner's Trace Elements<br>1 mL Vitamin Mix to MN                 |
| Minimal + N-acetyl Glucosamine | MN+NAG  | 10 g Dextrose<br>50 mL 20x Nitrate salts<br>1 mL Hutner's Trace Elements                                           |

|                                |                 |                                                                                                                                                                                                                                                                                                                                                                           |
|--------------------------------|-----------------|---------------------------------------------------------------------------------------------------------------------------------------------------------------------------------------------------------------------------------------------------------------------------------------------------------------------------------------------------------------------------|
|                                |                 | 4.74 g N-Acetyl Glucosamine (21.43 mM)                                                                                                                                                                                                                                                                                                                                    |
| Potato Dextrose Agar           | PDA             | 24 g Potato dextrose powder<br>15 g agar (if not in potato powder)                                                                                                                                                                                                                                                                                                        |
| Spider                         | Spider          | 20 g Nutrient Broth<br>20 g Mannitol<br>4 g K <sub>2</sub> HPO <sub>4</sub><br>27 g Agar<br>pH adjusted to 7.2 with NaOH                                                                                                                                                                                                                                                  |
| Yeast Extract Peptone Dextrose | YPD             | 20 g Dextrose<br>20 g Peptone<br>10 g Yeast Extract<br>20 g Agar                                                                                                                                                                                                                                                                                                          |
| V8                             | V8              | 200 mL V8 Juice<br>2 g CaCO <sub>3</sub><br>15 g Agar                                                                                                                                                                                                                                                                                                                     |
| <b>Additives</b>               | <b>Volume/L</b> | <b>Composition</b>                                                                                                                                                                                                                                                                                                                                                        |
| 20X Nitrate Salts/MN salts     | 1 L             | 120 g NaNO <sub>3</sub> (remove for “MN salts”)<br>10.4 g KCl<br>10.4 g MgSO <sub>4</sub> -7H <sub>2</sub> O<br>30.4 g KH <sub>2</sub> PO <sub>4</sub>                                                                                                                                                                                                                    |
| Hutner’s Trace Elements        | 100 mL          | 2.2 g ZnSO <sub>4</sub> -7H <sub>2</sub> O<br>1.1 g H <sub>3</sub> BO <sub>3</sub><br>0.5 g MnCl <sub>2</sub> -4H <sub>2</sub> O<br>0.5 g FeSO <sub>4</sub> -7H <sub>2</sub> O<br>0.17 g CoCl <sub>2</sub> -6H <sub>2</sub> O<br>0.16 g CuSO <sub>4</sub> -5H <sub>2</sub> O<br>0.15 g Na <sub>2</sub> MoO <sub>4</sub> -2H <sub>2</sub> O<br>5 g EDTA (Na <sub>4</sub> ) |
| Vitamin Mix                    | 100 mL          | 10 mg biotin<br>10 mg pyridoxin<br>10 mg thiamine<br>10 mg riboflavin<br>10 mg p-aminobenzoic acid (PABA)<br>10 mg nicotinic acid                                                                                                                                                                                                                                         |

Table 2: Nitrogen Sources, Concentrations, and Providers

| Nitrogen Source   | Concentration | Catalog number            |
|-------------------|---------------|---------------------------|
| No Nitrogen       | N/A           | N/A                       |
| Peptone           | 1% w/v        | Fisher Brand: BP1420      |
| L-Proline         | 100 mM        | Sigma: P-0380             |
| Ammonium tartrate | 100 mM        | Sigma: A2956              |
| L-Serine          | 100 mM        | Sigma: S4500              |
| Sodium Nitrate    | 100 mM        | Fisher Brand: S343        |
| Glycine           | 100 mM        | Fisher BioReagents: BP381 |



|                 |        |                    |
|-----------------|--------|--------------------|
| L-Glutamic acid | 100 mM | Sigma: G1251       |
| L-Aspartic acid | 100 mM | Sigma: A9256       |
| Urea            | 50 mM  | Alfa Aesar: A12360 |

Table 3: Metals used and their concentration

| <b>Metal</b>      | <b>Concentration</b> | <b>Catalog Number</b> |
|-------------------|----------------------|-----------------------|
| FeSO <sub>4</sub> | 1 M                  | Fisher: I146          |
| CoCl <sub>2</sub> | 0.5 M                | Sigma: C-2644         |
| NiCl <sub>2</sub> | 1.5 M                | Sigma-aldrich: 223387 |
| CuCl <sub>2</sub> | 1.5 M                | Sigma: 203149         |
| CdCl <sub>2</sub> | 10 mM                | Fisher: 7790-84-3     |
| AgNO <sub>3</sub> | 0.47 M               | Alfa Aesar: 7761-88-8 |

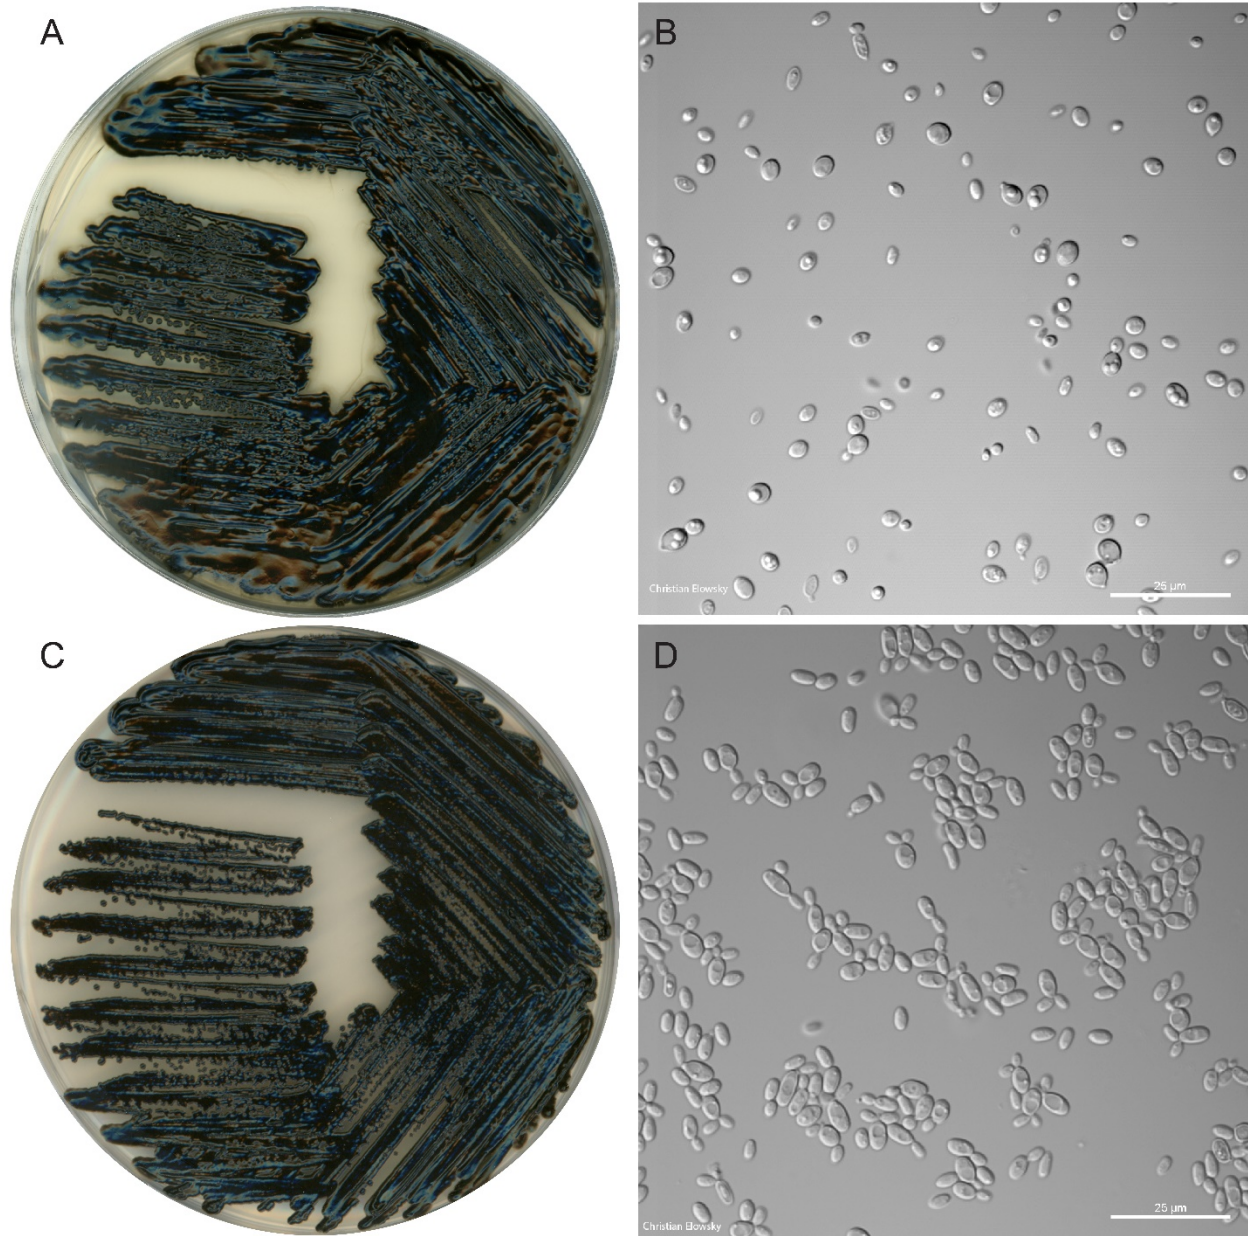

Figure 2: A) *E. viscosium* plate morphology; grown on an MEA plate for 10 days. B) *E. viscosium* cell morphology; grown in liquid MEA for 5 days; 60x objective lens. C) *E. limosus* plate morphology; grown on a MEA plate for 10 days. D) *E. limosus* cell morphology; grown in liquid MEA for 5 days; 60x objective lens. (Both plate photos and microscopy photos were taken by Christian Elowsky)

Table 4: Genome descriptions of the novel *Exophiala* species and close relatives

|                                   | <i>E. viscosium</i> | <i>E. limosus</i> | <i>E. sideris</i> | <i>E. spinifera</i> | <i>E. xenobiotica</i> | <i>E. oligosperma</i> | <i>E. dermatitidis</i> |
|-----------------------------------|---------------------|-------------------|-------------------|---------------------|-----------------------|-----------------------|------------------------|
| <b>Genome Assembly statistics</b> |                     |                   |                   |                     |                       |                       |                        |
| Genome Assembly size (Mbp)        | 28.29               | 28.23             | 29.51             | 32.91               | 31.41                 | 38.22                 | 26.35                  |

|                                 |                  |                  |                  |                  |                  |                  |                  |
|---------------------------------|------------------|------------------|------------------|------------------|------------------|------------------|------------------|
| Sequencing read coverage depth  | 147.3x           | 147.8x           | NA               | NA               | NA               | NA               | NA               |
| Number of contigs               | 35               | 27               | 69               | 143              | 64               | 287              | 10               |
| Number of scaffolds             | 30               | 17               | 5                | 28               | 15               | 143              | 10               |
| Number of scaffolds >= 2Kbp     | 25               | 17               | 5                | 20               | 11               | 129              | 10               |
| Scaffold N50                    | 4                | 5                | 2                | 4                | 3                | 5                | 4                |
| Scaffold L50 (Mbp)              | 2.24             | 2.89             | 7.9              | 3.79             | 5.04             | 3.39             | 3.62             |
| Number of gaps                  | 5                | 10               | 64               | 115              | 49               | 144              | 0                |
| % of scaffold length in gaps    | 0.00%            | 0.00%            | 0.10%            | 0.10%            | 0.10%            | 0.80%            | 0.00%            |
| Three largest Scaffolds (Mbp)   | 5.39, 4.56, 2.49 | 4.57, 3.58, 2.93 | 9.94, 7.90, 7.15 | 6.18, 3.93, 3.92 | 5.55, 5.20, 5.04 | 4.47, 4.29, 4.12 | 4.25, 4.22, 3.71 |
| GC content (%)                  | 51.91            | 49.26            | 49.73            | 49.42            | 51.89            | 50.99            | 51.74            |
| <b>Gene statistics</b>          |                  |                  |                  |                  |                  |                  |                  |
| Number of genes                 | 11344            | 11358            | 11120            | 12049            | 13187            | 13234            | 9562             |
| Gene length (bp, Average)       | 1840             | 1844             | 2044             | 1593             | 2072             | 2090             | 2237             |
| Gene length (bp, Median)        | 1666             | 1671             | 1823             | 1415             | 1845             | 1879             | 1923             |
| Transcript length (bp, Average) | 1740             | 1746             | 1933             | 1483             | 1941             | 1949             | 2122             |
| Transcript length (bp, Median)  | 1564             | 1574             | 1710             | 1311             | 1710             | 1735             | 1794             |
| Exon length (bp, Average)       | 705              | 707              | 776              | 621              | 738              | 743              | 896              |
| Exon length (bp, Median)        | 410              | 414              | 452              | 339              | 430              | 426              | 513              |
| Intron length (bp, Average)     | 70               | 69               | 74               | 81               | 80               | 85               | 85               |
| Intron length (bp, Median)      | 56               | 56               | 56               | 61               | 57               | 61               | 62               |
| Protein length (aa, Average)    | 488              | 489              | 500              | 494              | 492              | 488              | 501              |
| Protein length (aa, Median)     | 428              | 430              | 434              | 437              | 431              | 429              | 429              |
| Exons per gene (Average)        | 2.47             | 2.47             | 2.49             | 2.39             | 2.63             | 2.62             | 2.37             |
| Exons per gene (Median)         | 2                | 2                | 2                | 2                | 2                | 2                | 2                |

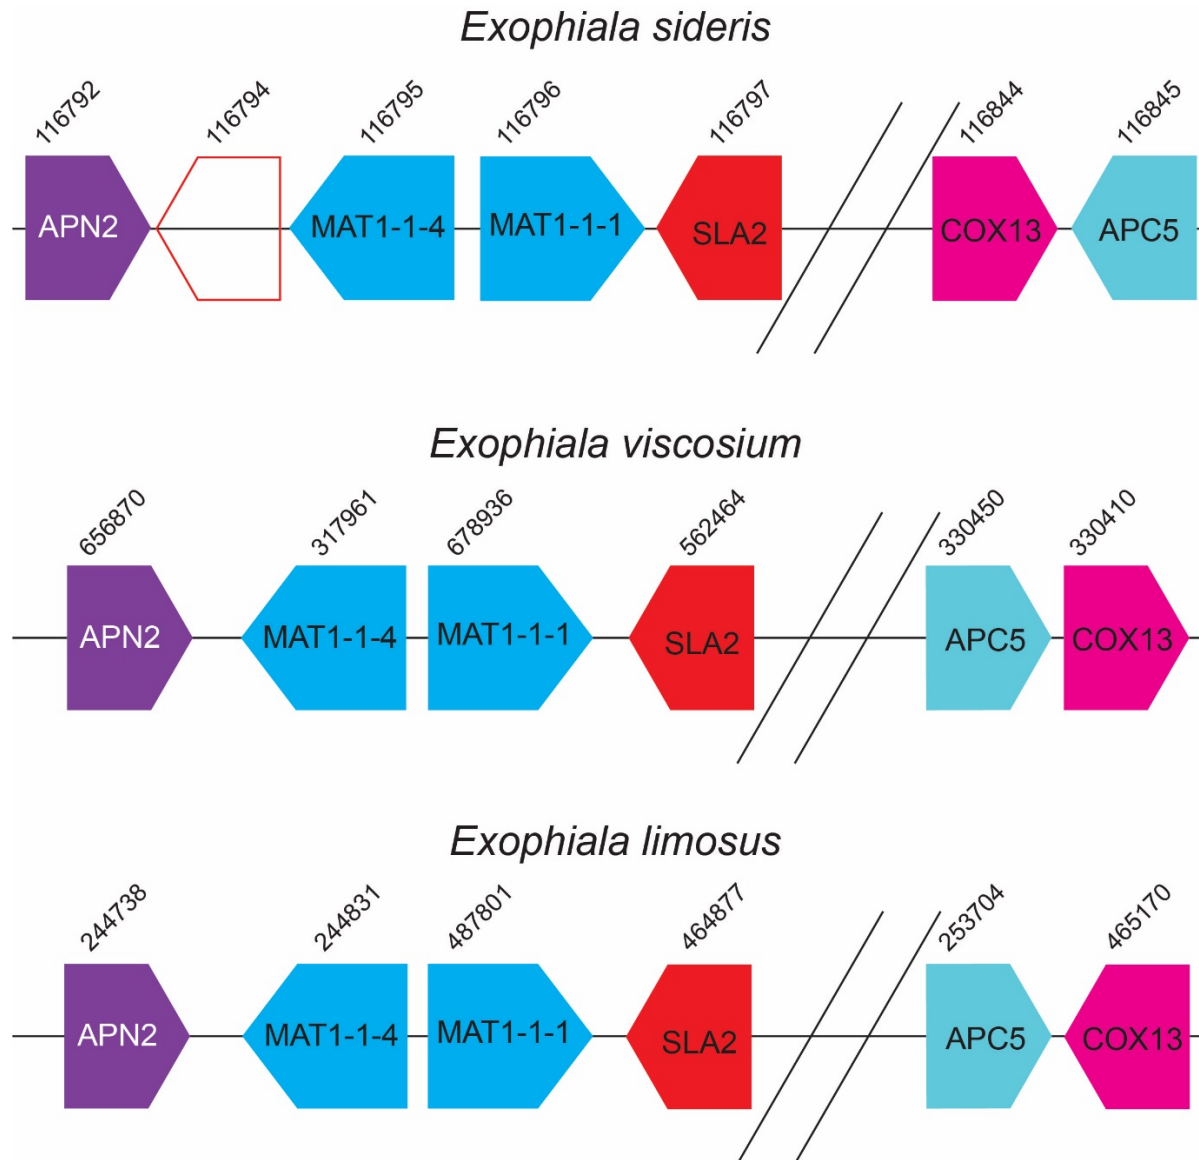

Figure 3: MAT loci gene order for *E. viscosum*, *E. limosus*, and *E. sideris*. In all three species the same genes are present within the MAT locus. *E. sideris* is indicated to have a hypothetical protein between APN2 and MAT1-1-4, whereas *E. viscosum* and *E. limosus* were not predicted to have that gene. Additionally, all three species have COX 13 and APC5 downstream of their mat loci, but the gene order or orientation is different amongst the three species.

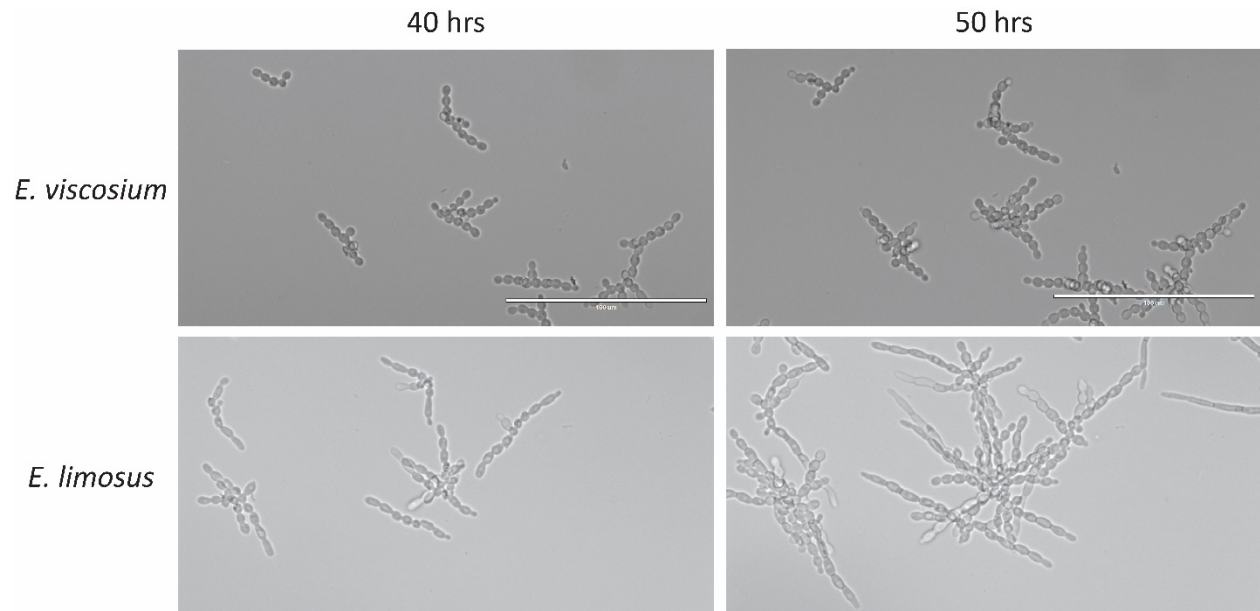

Figure 4: Budding styles of *E. viscosium* and *E. limosus*. Rate of budding is higher in *E. limosus* than in *E. viscosium*, as seen at the 50 hrs mark. Budding style is also different between the species, *E. viscosium* buds both distal polarly and proximal at close to a 90° angle, whereas *E. limosus* buds almost exclusively as a distal polar. *E. limosus*'s cells also elongate with every bud, forming almost hyphal-like structures at the 50 hr timepoint.



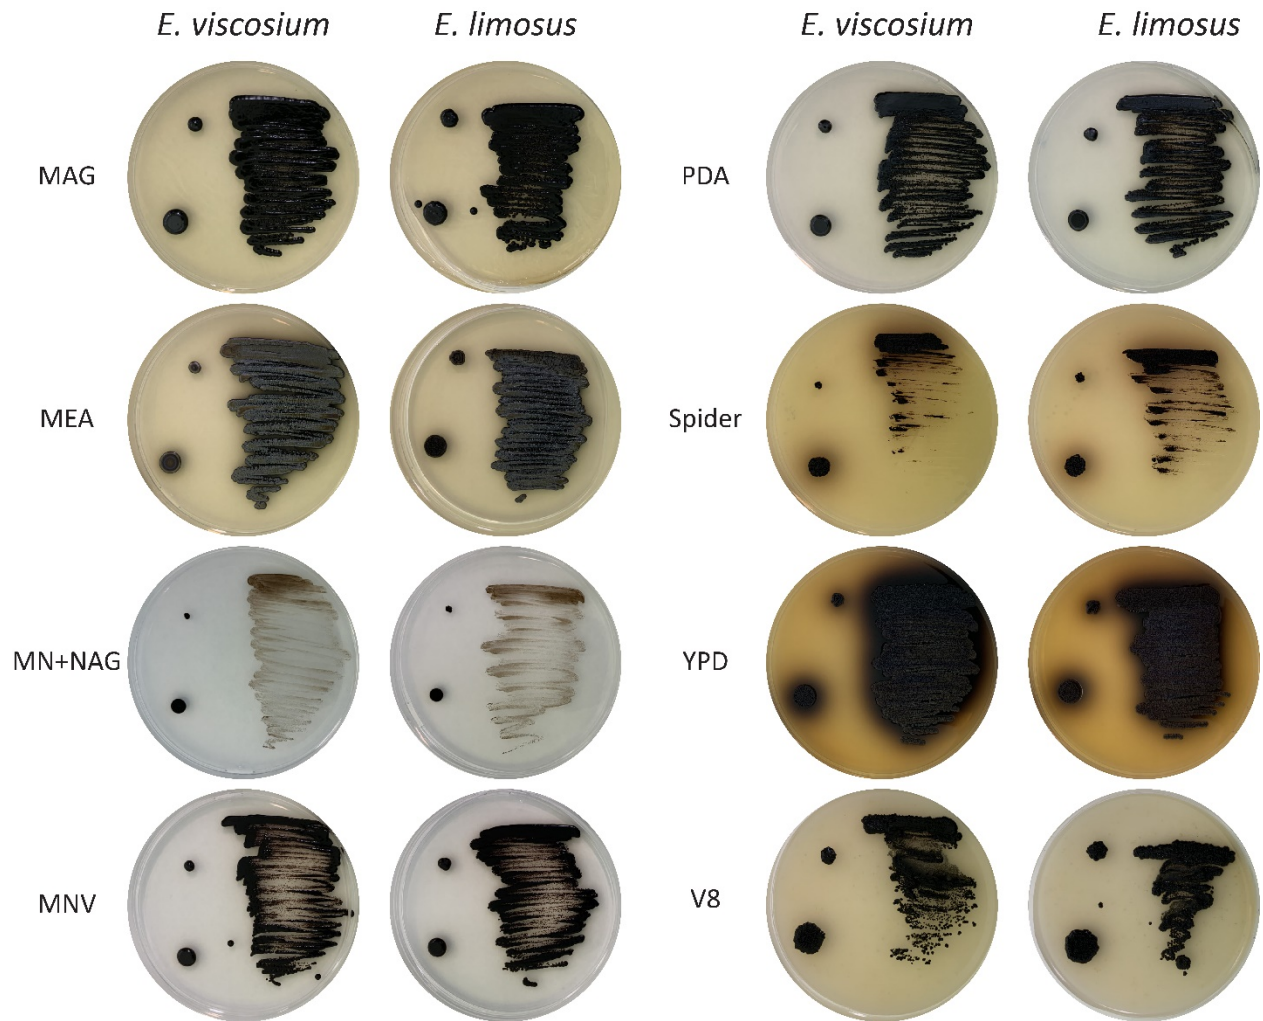

Figure 5: Growth of *E. viscosum* and *E. limosus* on eight different media types. Both species were capable of growth on all medias tested, but growth on MN+NAG showed the least amount of growth. PDA, MAG, and MNV allowed for very shiny and dark colonies to form in both species. Growth on V8 medium confirms potential for saprotrophic growth. Colorful secretions were observed on both Spider media and YPD for both species, though *E. viscosum* has more secretion into YPD than *E. limosus*.

Table 5: Carbon source utilization scores of *E. viscosum* and *E. limosus*

|   | <i>E. viscosum</i> |            |                           |          |                        |          |                      |          |             |            |            |            |              |            |             |              |           |                    |             |              |                           |                     |                                    |                            |            |           |           |           |          |             |              |                        |
|---|--------------------|------------|---------------------------|----------|------------------------|----------|----------------------|----------|-------------|------------|------------|------------|--------------|------------|-------------|--------------|-----------|--------------------|-------------|--------------|---------------------------|---------------------|------------------------------------|----------------------------|------------|-----------|-----------|-----------|----------|-------------|--------------|------------------------|
|   | D-galactose        | D-sorbitol | Actidione (cycloheximide) | D-xylose | D-saccharose (sucrose) | D-ribose | N-acetyl-glucosamine | Glycerol | Lactic acid | L-rhamnose | L-rabinose | palatinose | D-cellobiose | Erythritol | D-rafinoose | D-melibriose | D-maltose | sodium glucuronate | D-trehalose | D-melezitose | potassium 2-ketogluconate | potassium gluconate | methyl- $\alpha$ D-glucopyranoside | levulinic acid (levulinat) | D-mannitol | D-glucose | D-lactose | L-sorbose | Inositol | glucosamine | no substrate | Esculin ferric citrate |
| 1 | 4                  | 4          | 5                         | 4        | 1                      | 2        | 4                    | 4        | 3           | 4          | 4          | 3          | 4            | 2          | 1           | 1            | 4         | 2                  | 3           | 2            | 4                         | 2                   | 1                                  | 4                          | 3          | 5         | 1         | 5         | 2        | 1           | 1            | +                      |
| 2 | 5                  | 4          | 4                         | 4        | 1                      | 2        | 5                    | 4        | 3           | 4          | 4          | 3          | 4            | 2          | 1           | 1            | 4         | 2                  | 3           | 2            | 3                         | 2                   | 1                                  | 3                          | 3          | 5         | 1         | 5         | 2        | 1           | 1            | +                      |
| 3 | 4                  | 4          | 4                         | 4        | 1                      | 2        | 4                    | 4        | 3           | 4          | 4          | 3          | 4            | 2          | 1           | 1            | 4         | 2                  | 3           | 2            | 4                         | 2                   | 1                                  | 4                          | 3          | 5         | 1         | 5         | 2        | 1           | 1            | +                      |

|                   |         |         |         |         |         |         |         |         |         |         |         |         |         |         |         |         |         |         |         |         |         |         |         |         |         |         |         |         |         |         |         |   |
|-------------------|---------|---------|---------|---------|---------|---------|---------|---------|---------|---------|---------|---------|---------|---------|---------|---------|---------|---------|---------|---------|---------|---------|---------|---------|---------|---------|---------|---------|---------|---------|---------|---|
| A<br>vg           | 4.<br>3 | 4.<br>0 | 4.<br>3 | 4.<br>0 | 1.<br>0 | 2.<br>0 | 4.<br>3 | 4.<br>0 | 3.<br>0 | 4.<br>0 | 4.<br>0 | 3.<br>0 | 4.<br>0 | 2.<br>0 | 1.<br>0 | 1.<br>0 | 4.<br>0 | 2.<br>0 | 3.<br>0 | 2.<br>0 | 3.<br>7 | 2.<br>0 | 1.<br>0 | 3.<br>7 | 3.<br>0 | 5.<br>0 | 1.<br>0 | 5.<br>0 | 2.<br>0 | 1.<br>0 | 1.<br>0 | + |
|                   | +       | +       | +       | +       | -       | V       | +       | +       | V       | +       | +       | V       | +       | V       | -       | -       | +       | V       | V       | V       | +       | V       | -       | +       | V       | +       | -       | +       | V       | -       | -       | + |
| <i>E. limosus</i> |         |         |         |         |         |         |         |         |         |         |         |         |         |         |         |         |         |         |         |         |         |         |         |         |         |         |         |         |         |         |         |   |
| 1                 | 4       | 5       | 4       | 4       | 2       | 2       | 4       | 4       | 3       | 4       | 4       | 4       | 4       | 1       | 1       | 1       | 4       | 2       | 4       | 2       | 3       | 2       | 1       | 3       | 3       | 5       | 1       | 5       | 2       | 2       | 1       | + |
| 2                 | 4       | 5       | 4       | 4       | 2       | 2       | 4       | 4       | 3       | 4       | 4       | 4       | 4       | 2       | 1       | 1       | 4       | 2       | 3       | 2       | 3       | 2       | 1       | 4       | 3       | 5       | 1       | 5       | 2       | 2       | 1       | + |
| 3                 | 4       | 5       | 4       | 4       | 2       | 3       | 4       | 4       | 3       | 4       | 4       | 4       | 4       | 2       | 1       | 1       | 4       | 2       | 4       | 2       | 4       | 2       | 1       | 3       | 4       | 5       | 1       | 5       | 2       | 1       | 1       | + |
| A<br>vg           | 4.<br>0 | 5.<br>0 | 4.<br>0 | 4.<br>0 | 2.<br>0 | 2.<br>3 | 4.<br>0 | 4.<br>0 | 3.<br>0 | 4.<br>0 | 4.<br>0 | 4.<br>0 | 4.<br>0 | 1.<br>7 | 1.<br>0 | 1.<br>0 | 4.<br>0 | 2.<br>0 | 3.<br>7 | 2.<br>0 | 3.<br>3 | 2.<br>0 | 1.<br>0 | 3.<br>3 | 3.<br>3 | 5.<br>0 | 1.<br>0 | 5.<br>0 | 2.<br>0 | 1.<br>7 | 1.<br>0 | + |
|                   | +       | +       | +       | +       | V       | V       | +       | +       | V       | +       | +       | +       | +       | V       | -       | -       | +       | V       | +       | V       | V       | V       | -       | V       | V       | +       | -       | +       | V       | V       | -       | + |

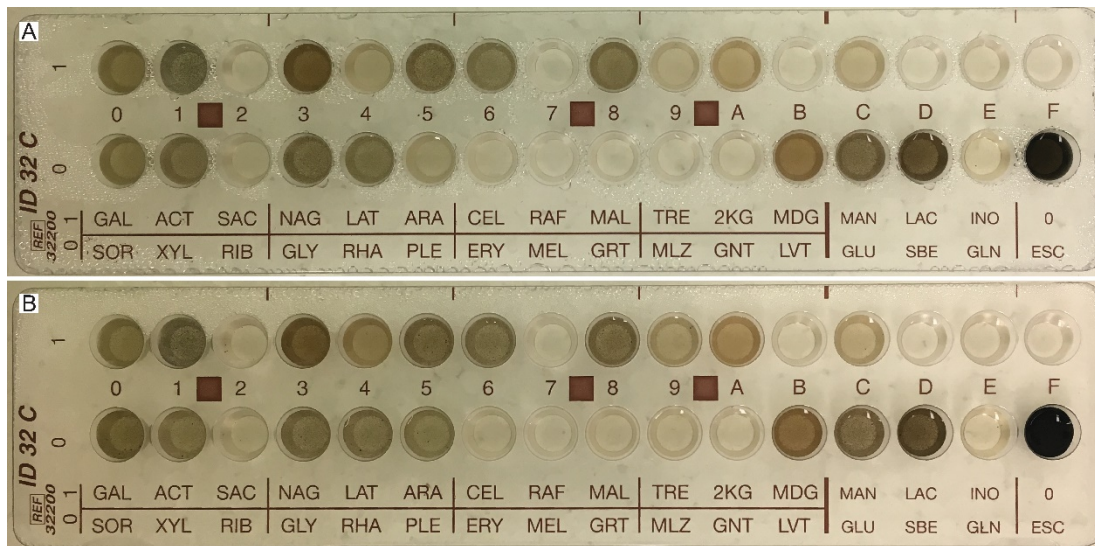

Figure 6: Growth of (A) *E. viscosium* and (B) *E. limosus* on C32 strips for determining carbon utilization. Both species were capable of using the same carbon sources, though some variations are seen. *E. limosus* was better at growing on palatinose, trehalose, potassium 2-ketogluconate, and mannitol than *E. viscosium*. *E. viscosium* was not better at growing on any carbon sources than *E. limosus*.

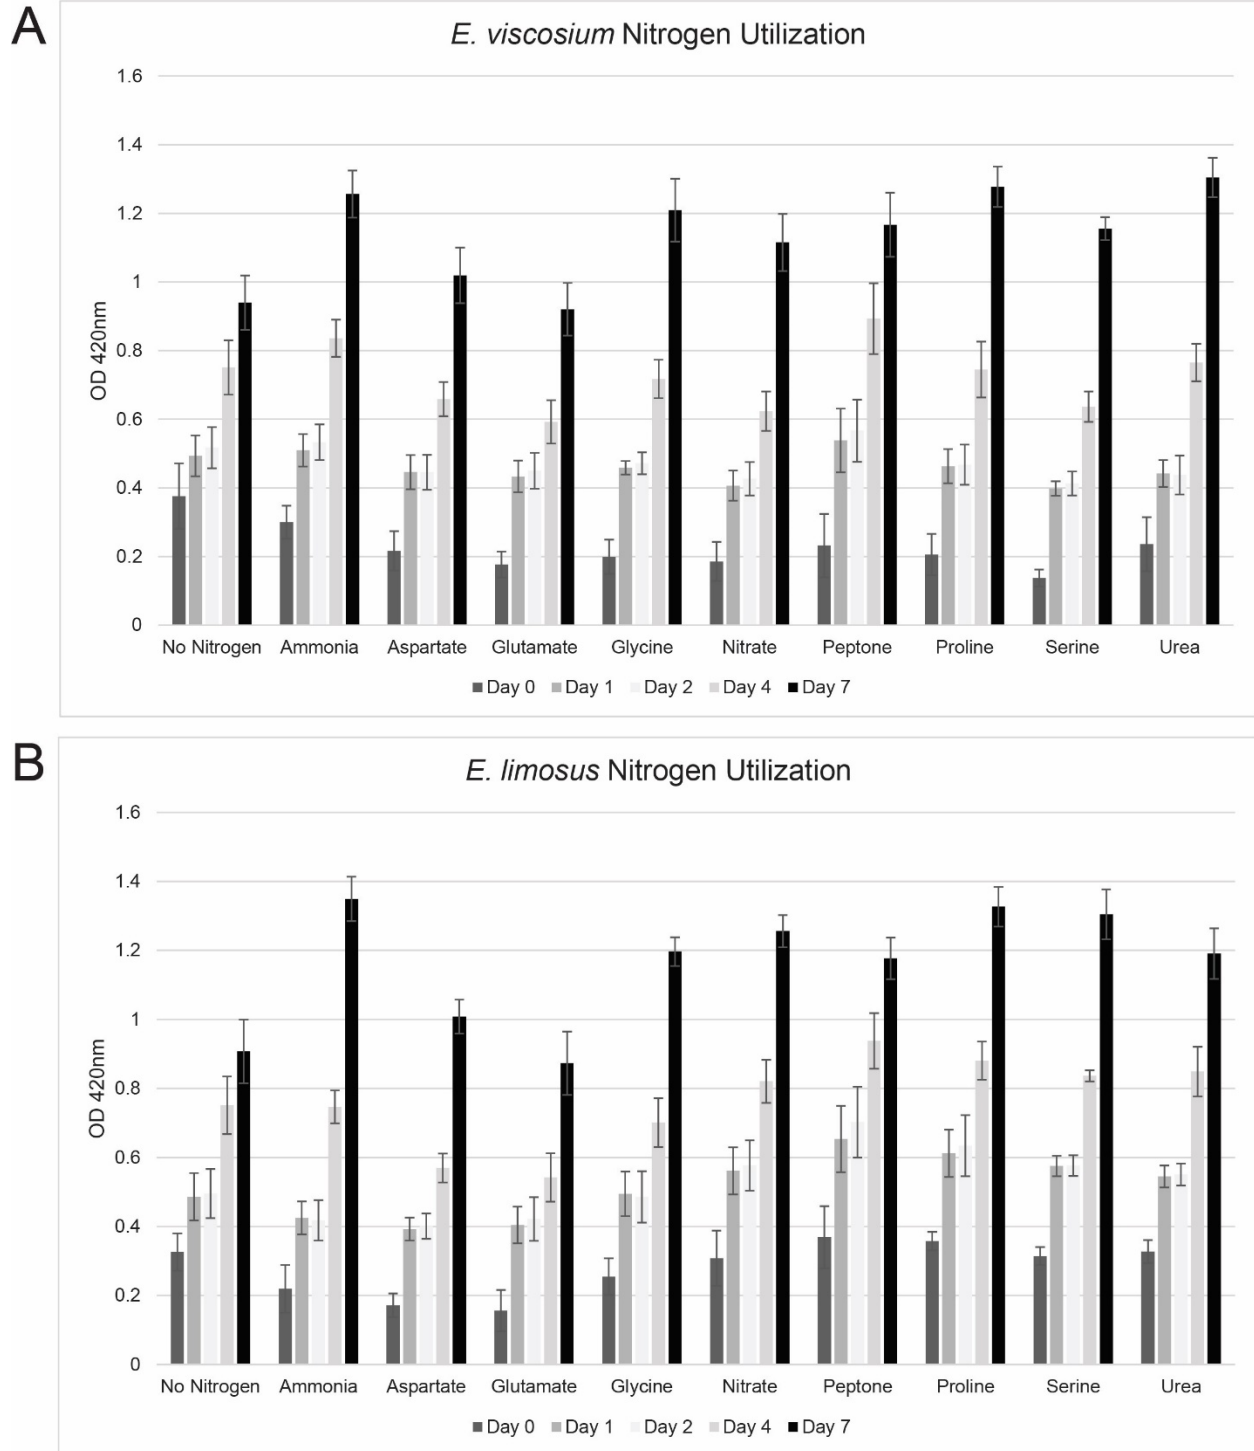

Figure 7: Nitrogen source utilization of *E. viscosium* and *E. limosus* in liquid culture. Neither species was capable of using aspartate or glutamate as a nitrogen source, as their growth amount were equivalent to no nitrogen. All other nitrogen sources tested were used by both species with varying preference. Ammonium was the preferred nitrogen source for *E. limosus*, and *E. viscosium* preferred urea and proline for nitrogen sources.

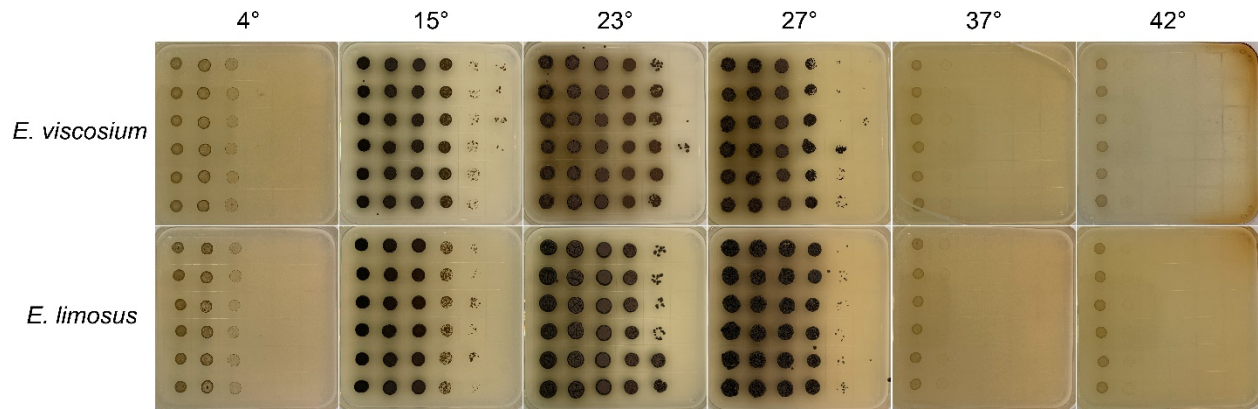

Figure 8: Growth of *E. viscosium* and *E. limosus* at varying temperatures. Neither species was capable of growth at or above 37° C, implying they are not human pathogens. Both species optimally grew at 23° C, but were capable of growth down to 4° C.

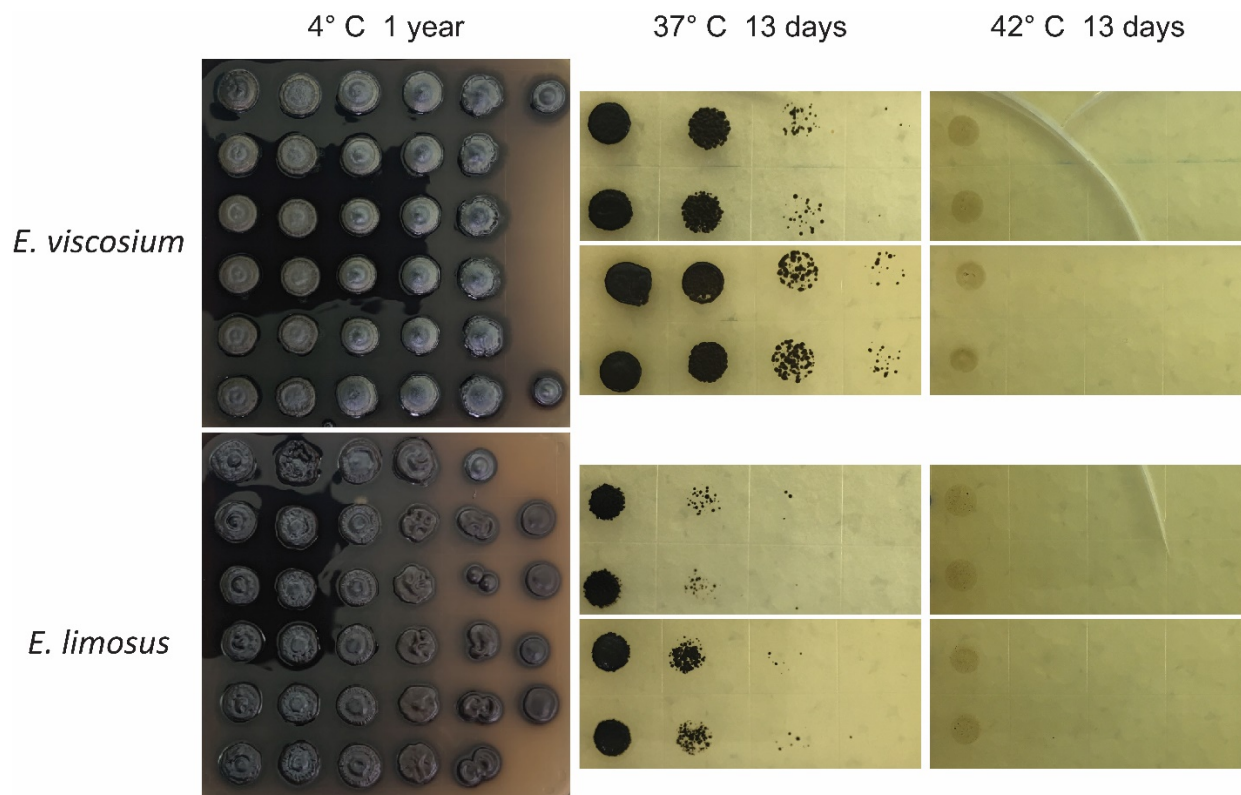

Figure 9: Growth of *E. viscosium* and *E. limosus* at the lowest and highest temperatures tested, after extended periods of time. Growth at 4° C continued for a year in both species, indicating that they can grow at these lower temperatures for extended periods of time. Additionally, we observed that while neither species was capable of active growth at 37° C it also was not too long of an exposure time to kill these cells. Whereas at 42° C neither species was capable of growth and was killed after 48 hrs of exposure.



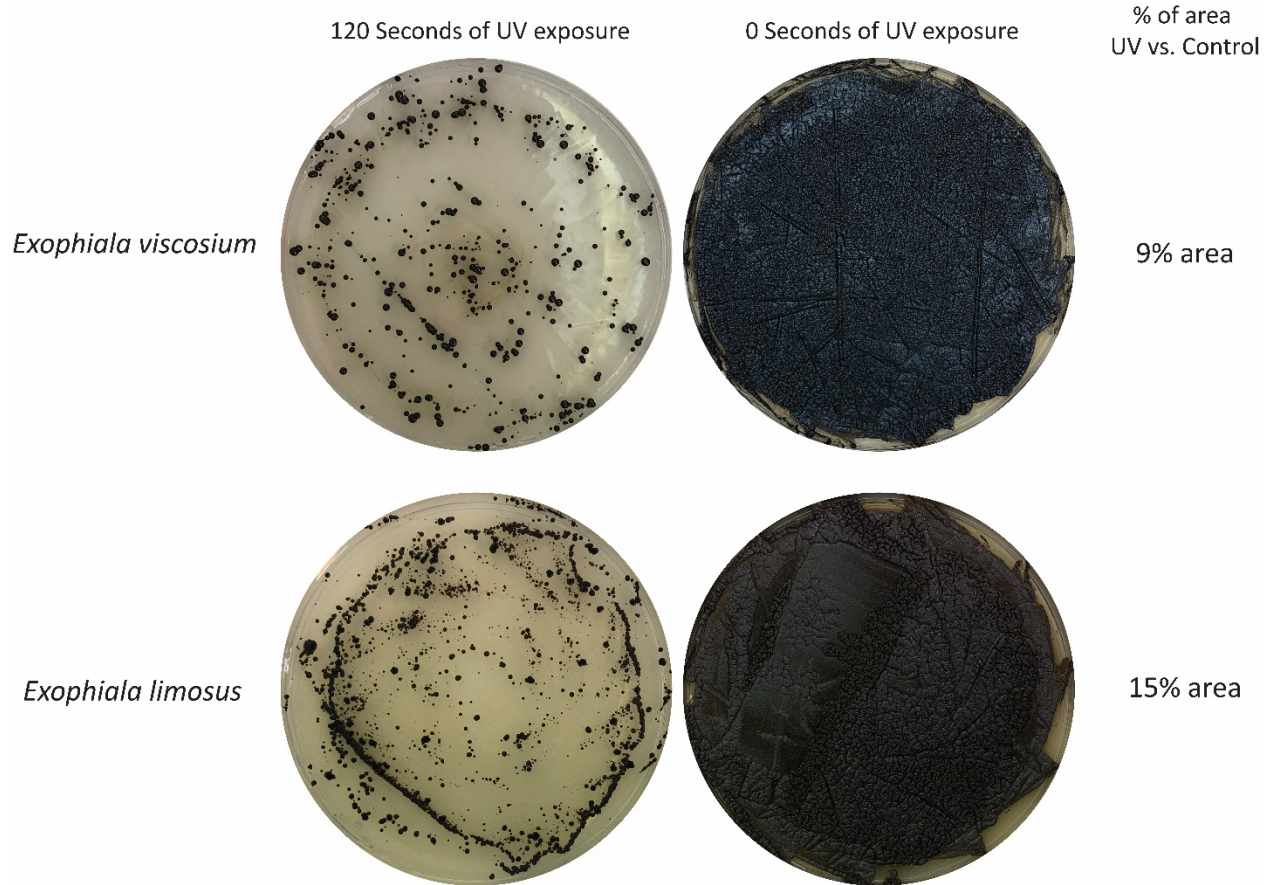

Figure 10: Difference in growth of *E. viscosum* and *E. limosus* with and without exposure to UV light. *E. viscosum* showed slightly less resistance to the UV exposure than *E. limosus*. Neither species was mutated from 120 seconds of UV exposure, normally *S. cerevisiae* and *E. dermatitidis* are incapable of growth after the same amount of UV exposure (data not shown).

Table 6: Diameter of the zone of clearing of *E. viscosum*, *E. limosus*, *E. dermatitidis*, and *S. cerevisiae* with various metals

| Species                | FeSO <sub>4</sub> 1 M | CoCl <sub>2</sub> 0.5 M | AgNO <sub>3</sub> 0.47 M | NiCl <sub>2</sub> 1.5 M | CuCl <sub>2</sub> 1.5 M | CdCl <sub>2</sub> 10 mM |
|------------------------|-----------------------|-------------------------|--------------------------|-------------------------|-------------------------|-------------------------|
| <i>E. viscosum</i>     | 1.6 cm                | 1.5 cm                  | 1.4 cm                   | 3.9 cm                  | 1.3 cm                  | 4.5 cm                  |
| <i>E. limosus</i>      | 1.8 cm                | 1.8 cm                  | 1.4 cm                   | 4 cm                    | 1.5 cm                  | 3.9 cm                  |
| <i>E. dermatitidis</i> | 1.3 cm                | 1 cm                    | 1.5 cm                   | 2 cm                    | 2.5 cm                  | 1.2 cm                  |
| <i>S. cerevisiae</i>   | 1 cm                  | 1.9 cm                  | 2 cm                     | 2.1 cm                  | 2 cm                    | 2.5 cm                  |



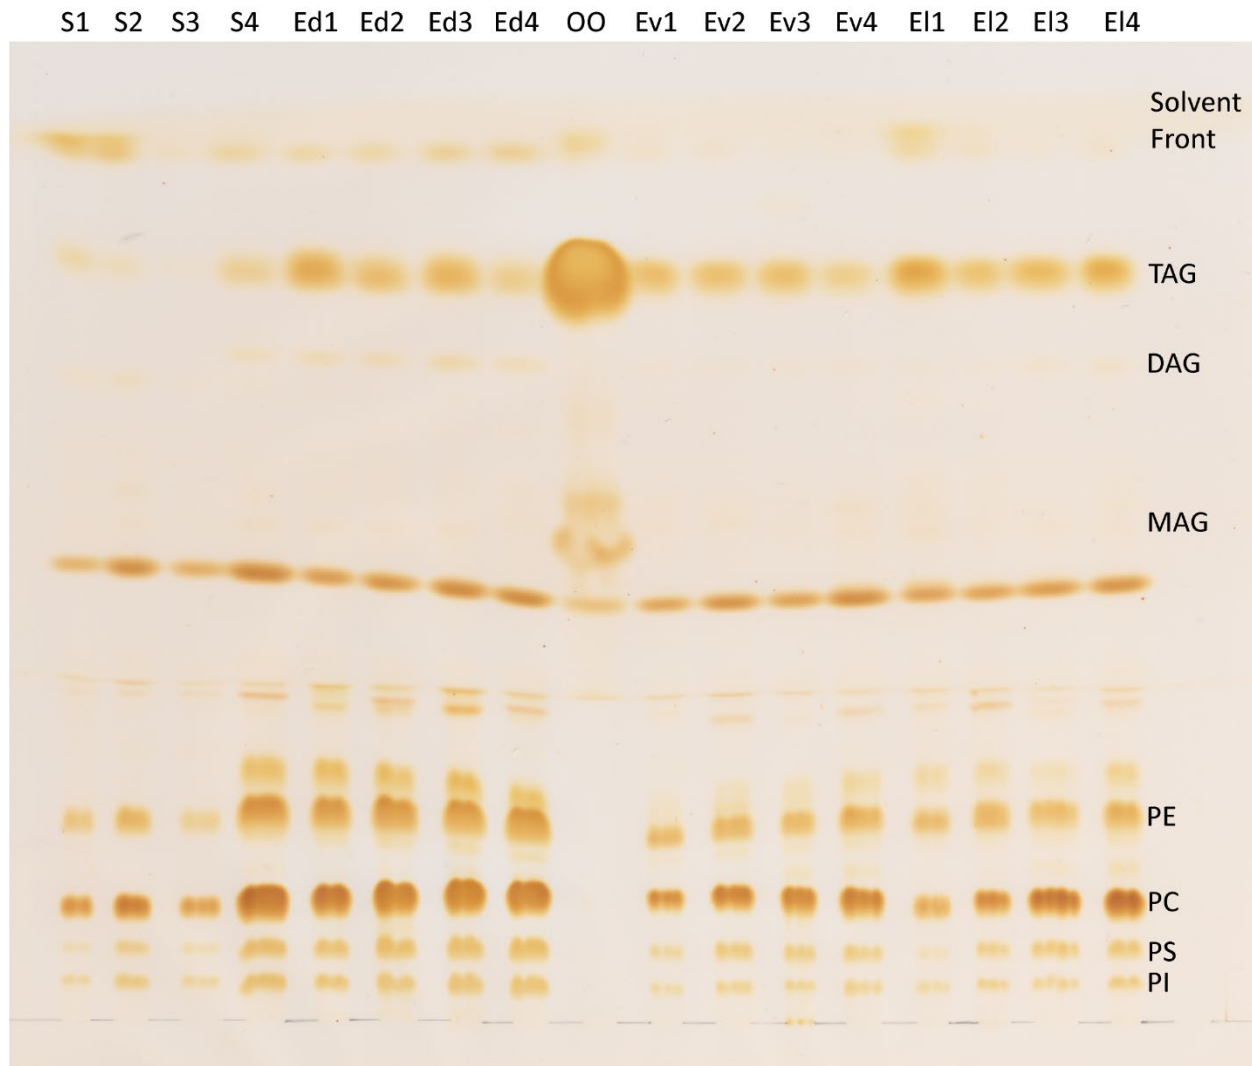

Figure 11: Lipid profile of *S. cerevisiae* (Sc), *E. dermatitidis* (Ed), *E. viscosum* (Ev), and *E. limosus* (El) using four different medias (1: MEA, 2: MEA + % peptone, 3: MEA + glycerol, 4: MEA + glycerol + % peptone). Differences in fermentable vs. non-fermentable carbon sources and amount of nitrogen source did not alter the amount or types of lipids produced by either *E. viscosum* or *E. limosus*. These fungi also showed no unique lipid production or any extreme accumulations of any lipids when compared to other fungi.

Table 7: Annotation of melanin biosynthetic genes for *E. viscosum* and *E. limosus*.

| PKS/DHN/Allomelanin pathway |                                         |                                        |
|-----------------------------|-----------------------------------------|----------------------------------------|
| Gene in <i>A. niger</i>     | <i>E. viscosum</i> Homolog protein ID # | <i>E. limosus</i> Homolog protein ID # |
| Pks1                        | 580617                                  | 463165                                 |
| Ayg1                        | 511449                                  | 494160                                 |
| Arp2                        | 676985                                  | 479993, 453709                         |
| Arp1                        | 477931                                  | 210894                                 |
| Abr2                        | 603697, 153763                          | 326274, 72468                          |

|                                                  |                                                 |                                               |
|--------------------------------------------------|-------------------------------------------------|-----------------------------------------------|
| Abr1                                             | 648725, 437535                                  | 258543, 441397                                |
|                                                  | 387337, 648725                                  | 92776, 258543                                 |
|                                                  | 648725, 653857                                  | 258543, 102128                                |
| <b>DOPA/Eumelanin/Pheomelanin pathway</b>        |                                                 |                                               |
| <b>Gene in <i>A. niger</i></b>                   | <b><i>E. viscosium</i> Homolog protein ID #</b> | <b><i>E. limosus</i> Homolog protein ID #</b> |
| MelC2                                            | 140179, 643161                                  | 84855                                         |
|                                                  | 140179                                          | 84855                                         |
| MelO                                             | -                                               | -                                             |
| McoJ                                             | 571417                                          | 465594                                        |
| McoM                                             | 571417                                          | 465594                                        |
| McoD                                             | 437535                                          | 441397                                        |
| McoG                                             | 437535                                          | 441397                                        |
| McoF                                             | 437535                                          | 441397                                        |
| McoN                                             | 653857, 649741                                  | 102128, 454148                                |
| McoI                                             | 653857, 649741                                  | 102128, 454148                                |
| <b>L-Tyrosine degradation/Pyomelanin pathway</b> |                                                 |                                               |
| <b>Gene in <i>A. niger</i></b>                   | <b><i>E. viscosium</i> Homolog protein ID #</b> | <b><i>E. limosus</i> Homolog protein ID #</b> |
| Tat                                              | 606461                                          | 34310                                         |
| hppD                                             | 623446                                          | 39306                                         |
| hmgA                                             | 617354, 102643, 403121                          | 430149, 483886, 431641                        |
| fahA                                             | 617341                                          | 148504                                        |
| maiA                                             | 213100                                          | 198633                                        |

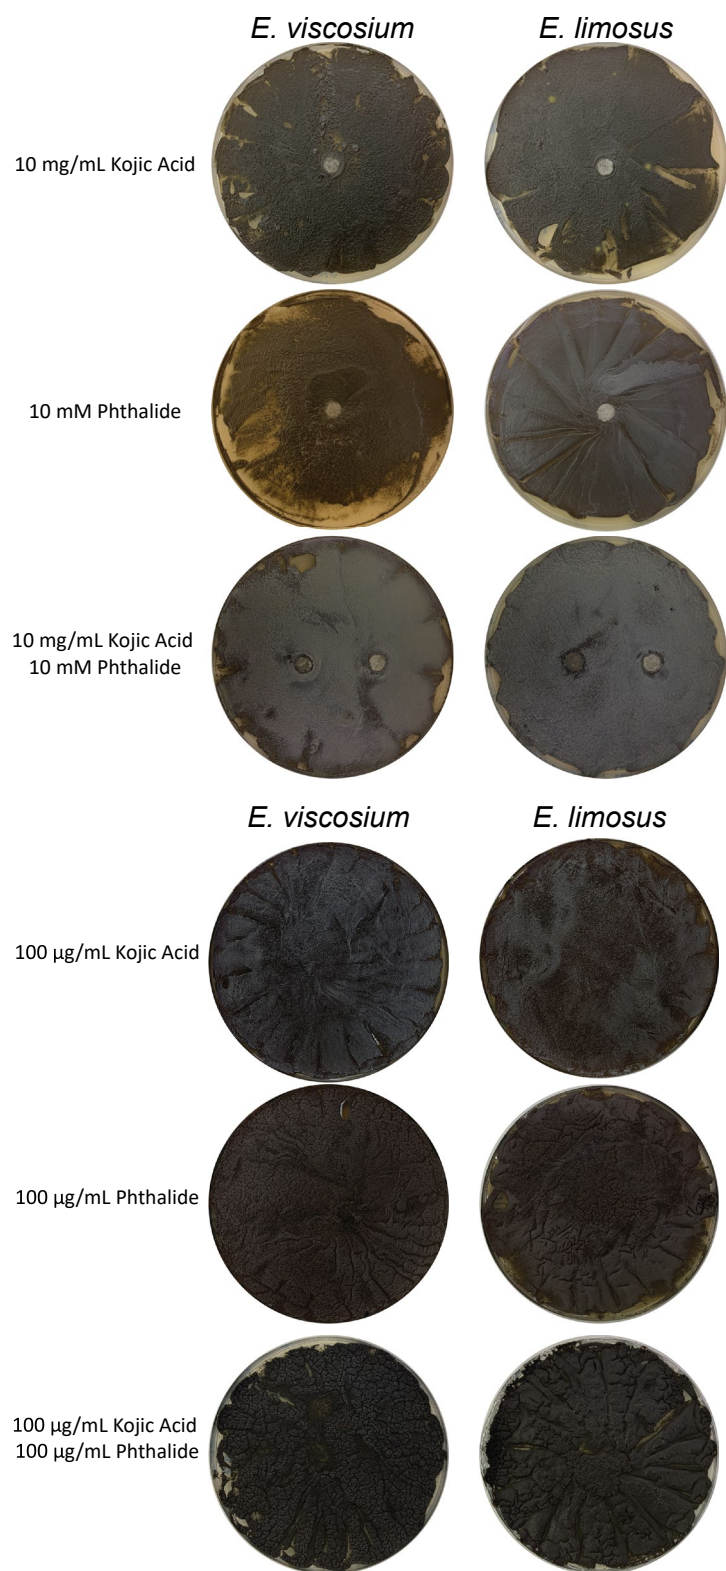

Figure 12

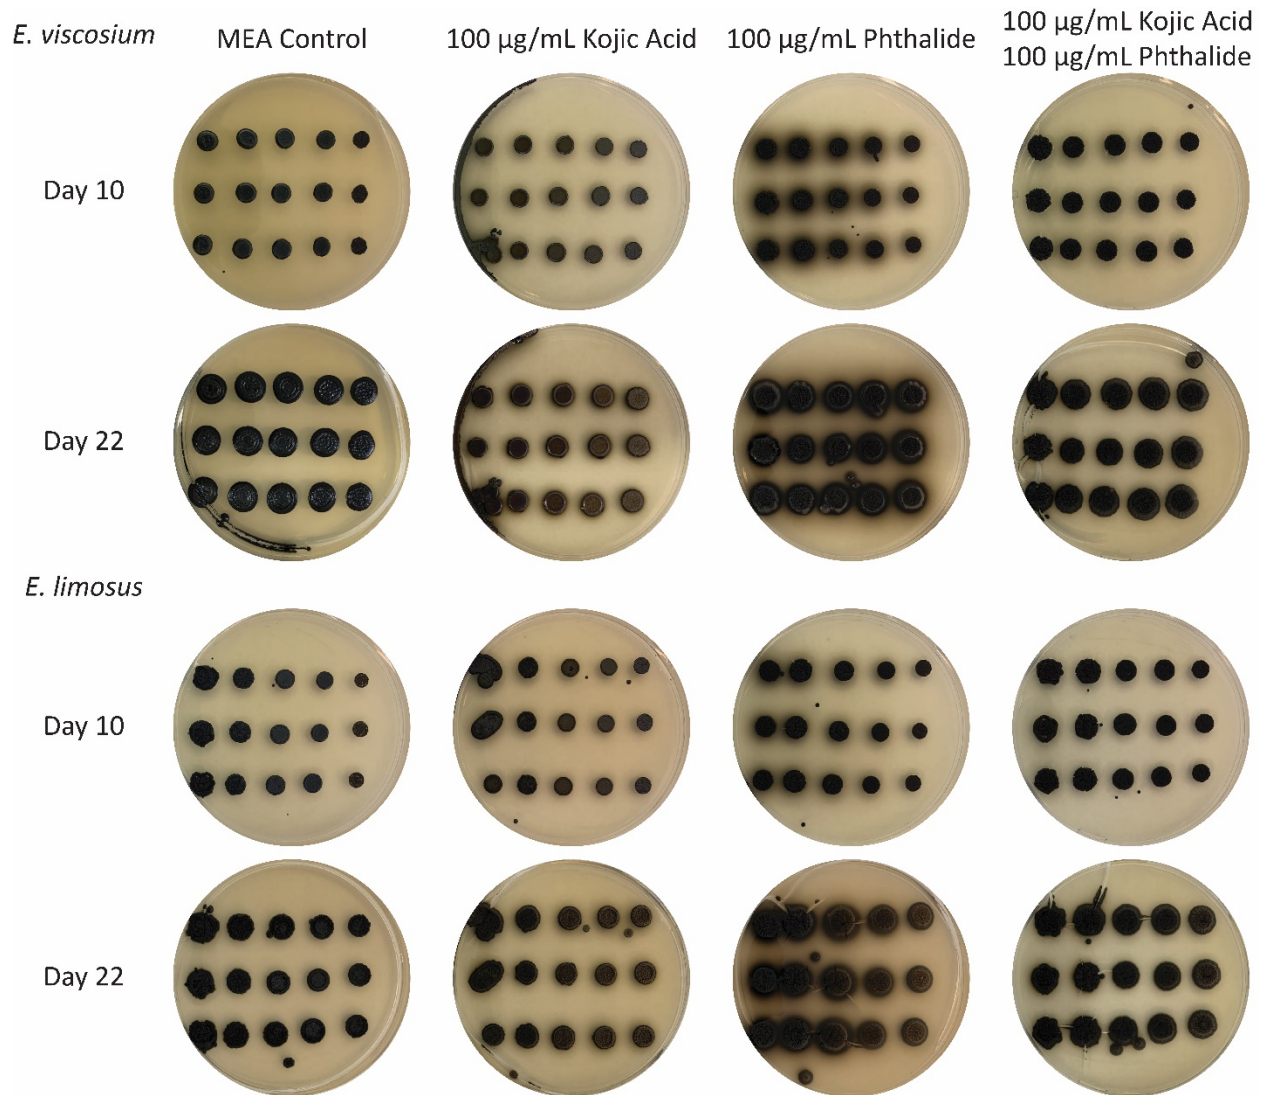

Figure 13: Growth of *E. viscosium* and *E. limosus* in the presence of melanin blockers kojic acid and phthalide. Neither chemical melanin blocker was capable of blocking melanin production in either fungi even when both chemical blockers were used simultaneously. Additionally, use of phthalide on *E. viscosium* induced melanin secretion on a medium where this does not usually occur. The melanin halo around *E. viscosium*'s colonies on medium containing phthalide was replaced with hyphal growth after 22 days.

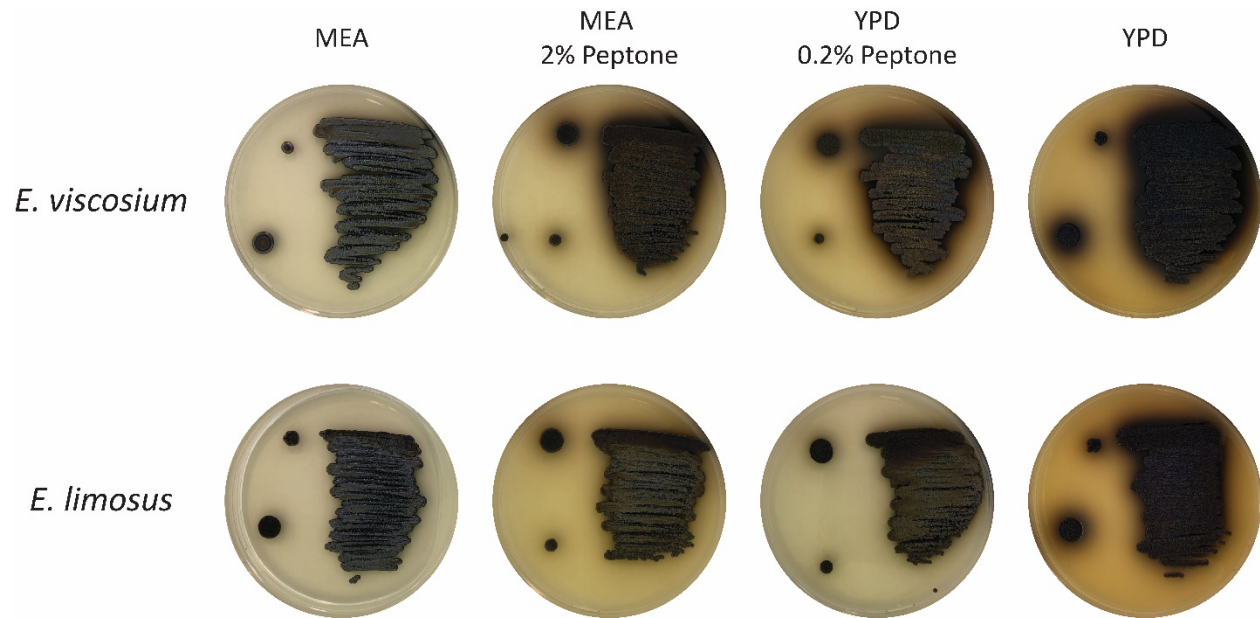

Figure 14: *E. viscosium* and *E. limosus* grown on MEA and YPD with different concentrations of peptone. *E. viscosium* is capable of melanin secretion on MEA with 2% peptone, which is the same amount of peptone in regular YPD. *E. limosus* was not as capable of secreting melanin in the MEA + 2% peptone, but there is a slight amount of secreted melanin. *E. viscosium* was also capable of secreting melanin on YPD with 0.2% peptone, indicating that yeast extract might have more available nitrogen than malt extract.



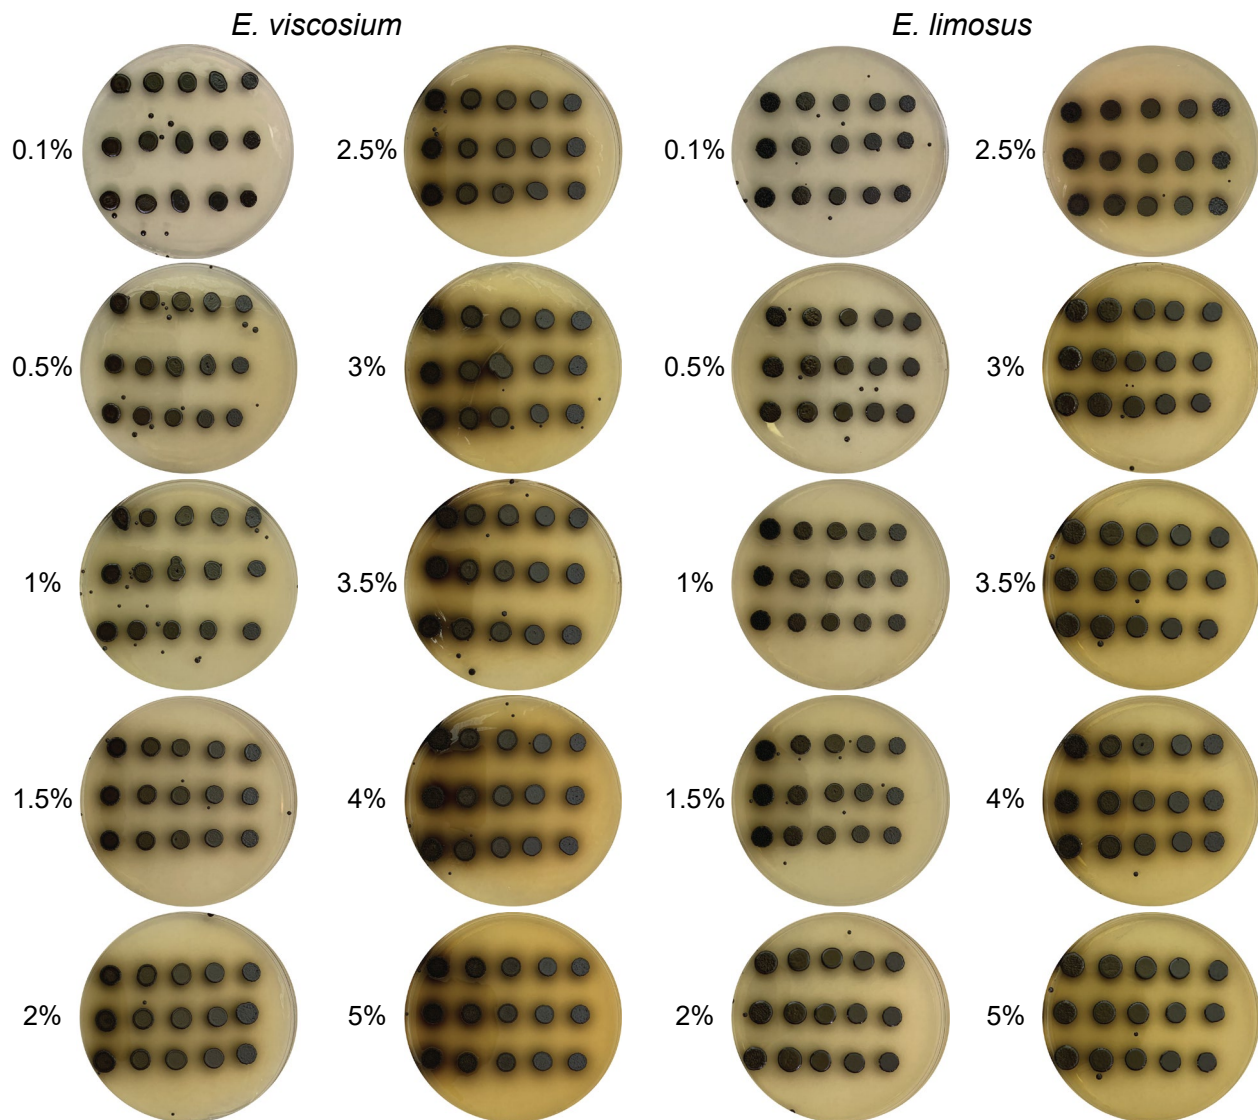

Figure 15: *E. viscosium* and *E. limosus* grown on MEA with increasing amounts of peptone. The higher the amount of peptone in the medium, the more melanin was secreted. *E. viscosium* started secreting melanin at 2%, and *E. limosus* at 4%.

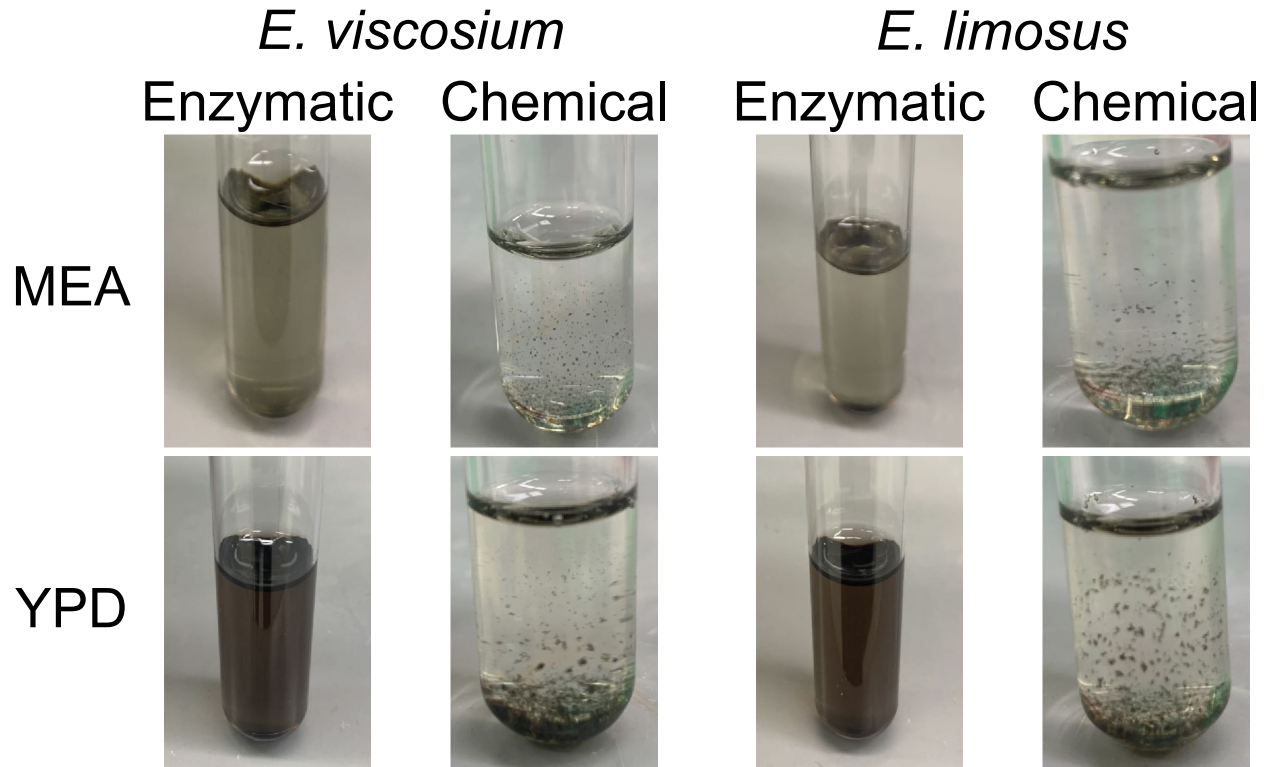

Figure 16: Extraction of melanin from supernatants of *E. viscosium* and *E. limosus* using both enzymatic and chemical methods described in (Pralea et al., 2019). Enzymatic extraction methods were incapable of extracting all the melanin, leaving behind a dark supernatant in the last step. However, melanin extracted by chemical extraction methods had complete extraction of the secreted melanin.

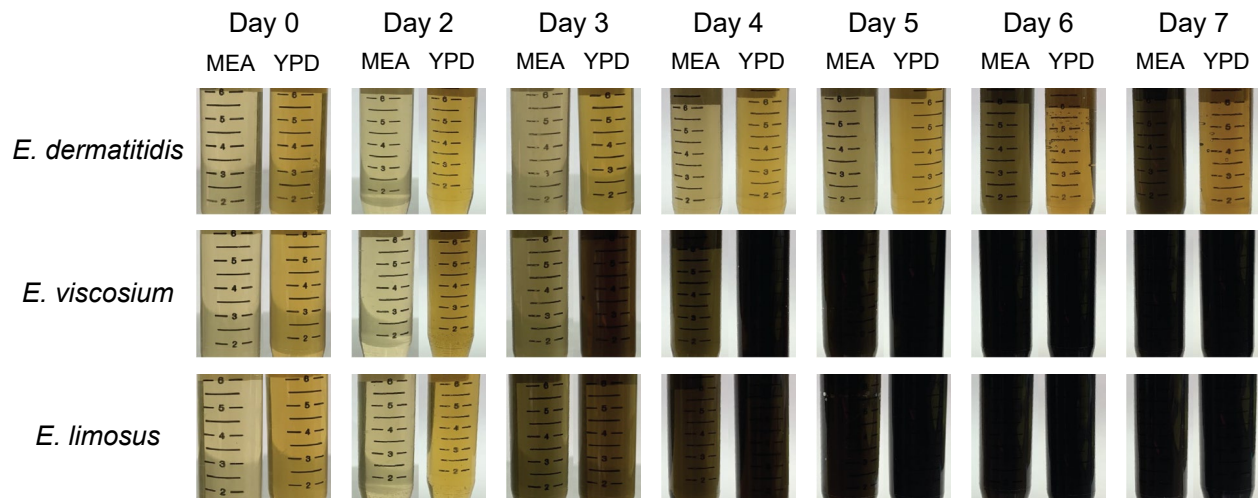

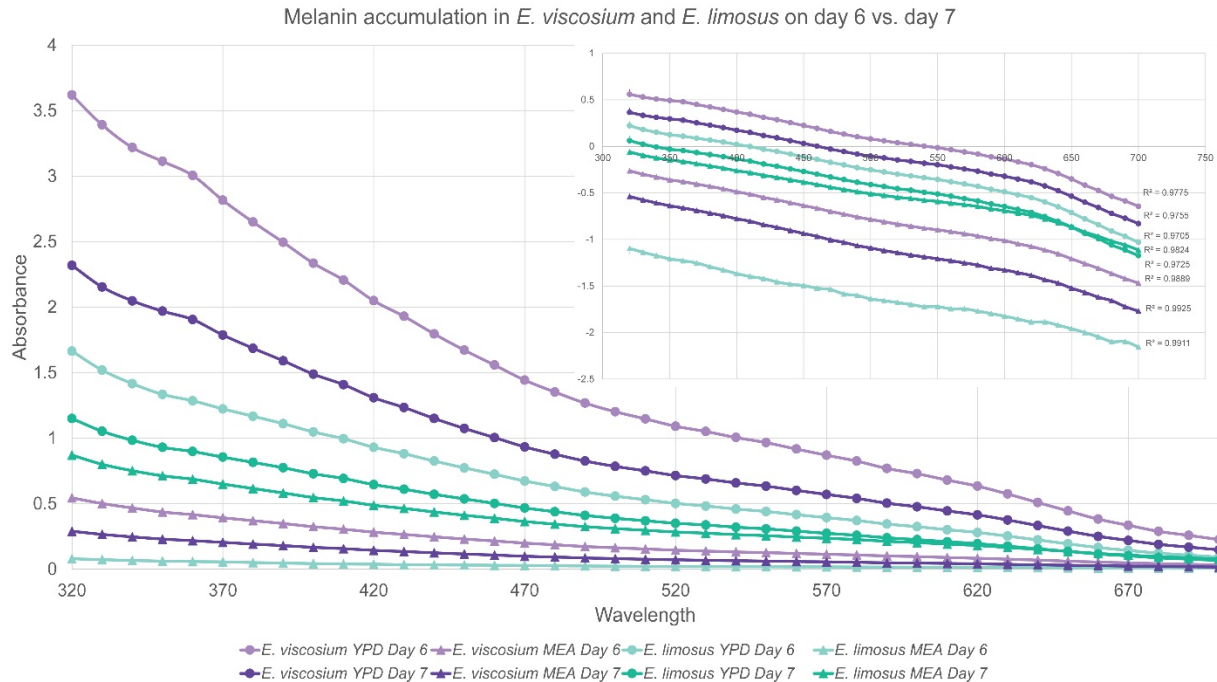

Figure 16: Day 7 results of daily melanin extraction from *E. viscosium*, *E. limosus*, and *E. dermatitidis*. All samples display typical melanin properties with full spectrum light, in that all samples have a linear regression with an R2 value of 0.97 or higher. The sample with the highest amount of secreted melanin on day 7 was *E. viscosium* in YPD. Both *E. viscosium* and *E. limosus* had more secreted melanin when grown on YPD as opposed to MEA which showed lower melanin secretion for both species. *E. dermatitidis* on the other hand had the highest amount of melanin in the supernatant in MEA than on YPD.

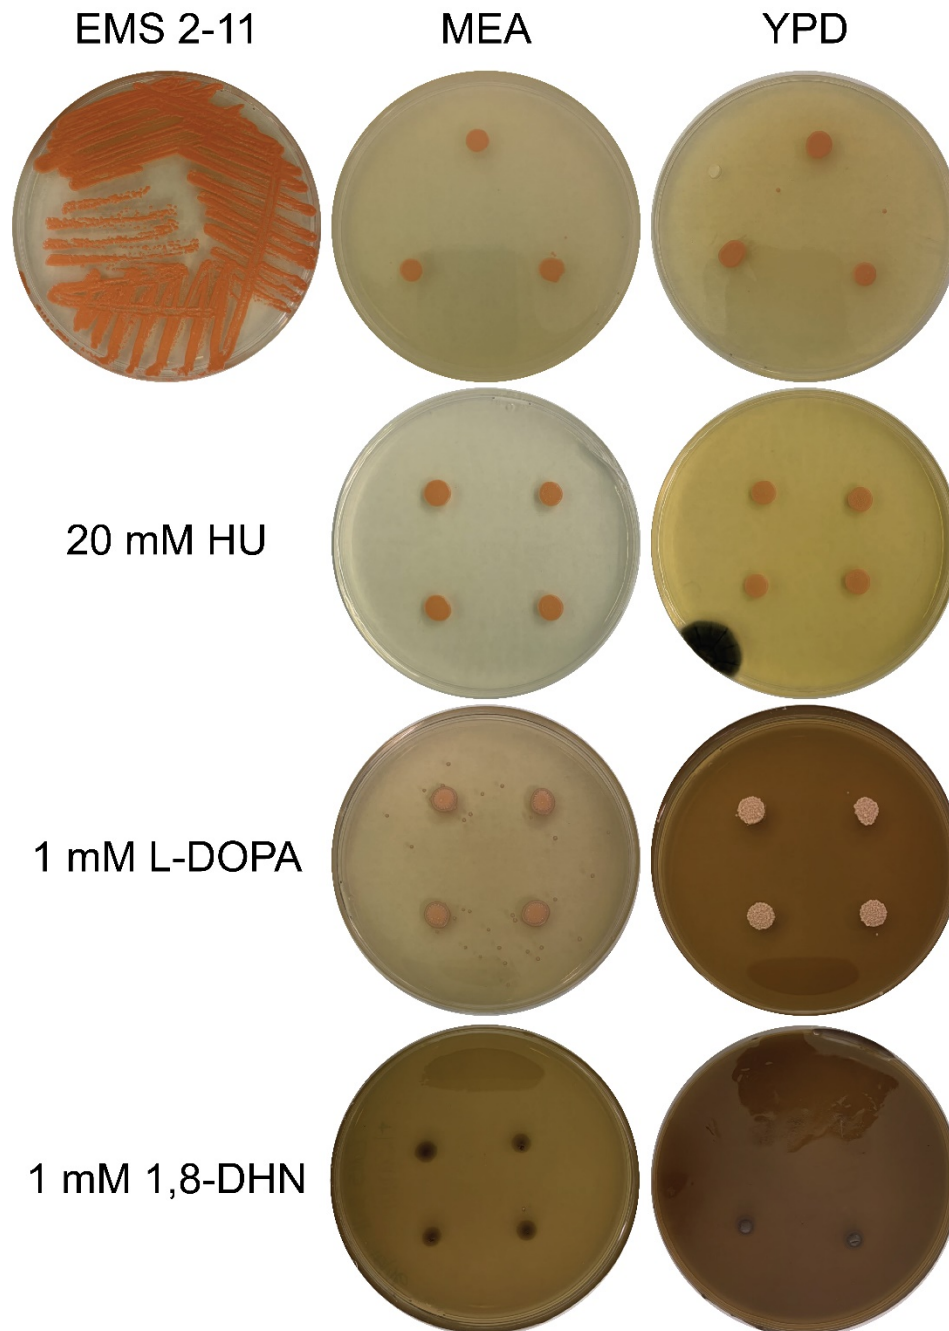

Figure 17: Phenotype of the EMS 2-11 mutant of *E. limosus* with *pks1* nonsense mutation, causing melanin production to be stopped hence the pink coloration. Attempts to recover melanin production were done with Hydroxyurea (HU), L-DOPA, and 1,8-DHN. Neither HU or DOPA was able to recover the melanin in the mutant, however 1,8-DHN was able to recover melanin production in this mutant.
